# Supplementary material
Source: PubMed Central journal article supplement (PMC2952172)
Supplement: NIHMS237594-supplement-SI2.pdf [file NIHMS237594-supplement-SI2.pdf]

## Supporting Information

### Synthetic Utility of an Isolable Nucleoside Phosphonium Salt

Suyeal Bae and Mahesh K. Lakshman\*

Department of Chemistry, The City College and The City University of New York,  
160 Convent Avenue, New York, New York 10031-9198.

#### Table of Contents

| Information                                                                                                                                                                                                                                                            | Page |
|------------------------------------------------------------------------------------------------------------------------------------------------------------------------------------------------------------------------------------------------------------------------|------|
| <sup>1</sup> H NMR spectrum of <i>O</i> <sup>6</sup> -benzyl-3',5'-bis- <i>O</i> -( <i>tert</i> -butyldimethylsilyl)- <i>O</i> <sup>2</sup> -tris(dimethylamino)phosphonium-2'-deoxyxanthosine hexafluorophosphate ( <b>3</b> ) in CDCl <sub>3</sub>                   | S3   |
| <sup>13</sup> C NMR spectrum of <i>O</i> <sup>6</sup> -benzyl-3',5'-bis- <i>O</i> -( <i>tert</i> -butyldimethylsilyl)- <i>O</i> <sup>2</sup> -tris(dimethylamino)phosphonium-2'-deoxyxanthosine hexafluorophosphate ( <b>3</b> ) in CDCl <sub>3</sub>                  | S4   |
| <sup>31</sup> P NMR spectrum of <i>O</i> <sup>6</sup> -benzyl-3',5'-bis- <i>O</i> -( <i>tert</i> -butyldimethylsilyl)- <i>O</i> <sup>2</sup> -tris(dimethylamino)phosphonium-2'-deoxyxanthosine hexafluorophosphate ( <b>3</b> ) in CDCl <sub>3</sub>                  | S5   |
| <sup>1</sup> H NMR spectrum of <i>O</i> <sup>6</sup> -benzyl-3',5'-bis- <i>O</i> -( <i>tert</i> -butyldimethylsilyl)-2-(morpholin-4-yl)-2'-deoxyinosine ( <b>4a</b> ) in CDCl <sub>3</sub>                                                                             | S6   |
| <sup>13</sup> C NMR spectrum <i>O</i> <sup>6</sup> -benzyl-3',5'-bis- <i>O</i> -( <i>tert</i> -butyldimethylsilyl)-2-(morpholin-4-yl)-2'-deoxyinosine ( <b>4a</b> ) in CDCl <sub>3</sub>                                                                               | S7   |
| <sup>1</sup> H NMR spectrum of <i>O</i> <sup>6</sup> -benzyl-3',5'-bis- <i>O</i> -( <i>tert</i> -butyldimethylsilyl)-2-(piperidin-1-yl)-2'-deoxyinosine ( <b>4b</b> ) in CDCl <sub>3</sub>                                                                             | S8   |
| <sup>13</sup> C NMR spectrum of <i>O</i> <sup>6</sup> -benzyl-3',5'-bis- <i>O</i> -( <i>tert</i> -butyldimethylsilyl)-2-(piperidin-1-yl)-2'-deoxyinosine ( <b>4b</b> ) in CDCl <sub>3</sub>                                                                            | S9   |
| <sup>1</sup> H NMR spectrum of <i>O</i> <sup>6</sup> -benzyl-3',5'-bis- <i>O</i> -( <i>tert</i> -butyldimethylsilyl)-2-(pyrrolidin-1-yl)-2'-deoxyinosine ( <b>4c</b> ) in CDCl <sub>3</sub>                                                                            | S10  |
| <sup>13</sup> C NMR spectrum of <i>O</i> <sup>6</sup> -benzyl-3',5'-bis- <i>O</i> -( <i>tert</i> -butyldimethylsilyl)-2-(pyrrolidin-1-yl)-2'-deoxyinosine ( <b>4c</b> ) in CDCl <sub>3</sub>                                                                           | S11  |
| <sup>1</sup> H NMR spectrum of <i>O</i> <sup>6</sup> -benzyl-3',5'-bis- <i>O</i> -( <i>tert</i> -butyldimethylsilyl)-2-(1,4-dioxa-8-azaspiro[4.5]dec-8-yl)-2'-deoxyinosine ( <b>4d</b> ) in CDCl <sub>3</sub>                                                          | S12  |
| <sup>13</sup> C NMR spectrum of <i>O</i> <sup>6</sup> -benzyl-3',5'-bis- <i>O</i> -( <i>tert</i> -butyldimethylsilyl)-2-(1,4-dioxa-8-azaspiro[4.5]dec-8-yl)-2'-deoxyinosine ( <b>4d</b> ) in CDCl <sub>3</sub>                                                         | S13  |
| <sup>1</sup> H NMR spectrum of <i>O</i> <sup>6</sup> -benzyl-3',5'-bis- <i>O</i> -( <i>tert</i> -butyldimethylsilyl)-2-[4-(4-nitrophenyl)-piperizin-1-yl]-2'-deoxyinosine ( <b>4e</b> ) in CDCl <sub>3</sub>                                                           | S14  |
| <sup>13</sup> C NMR spectrum of <i>O</i> <sup>6</sup> -benzyl-3',5'-bis- <i>O</i> -( <i>tert</i> -butyldimethylsilyl)-2-[4-(4-nitrophenyl)-piperizin-1-yl]-2'-deoxyinosine ( <b>4e</b> ) in CDCl <sub>3</sub>                                                          | S15  |
| <sup>1</sup> H NMR spectrum of <i>O</i> <sup>6</sup> -benzyl-3',5'-bis- <i>O</i> -( <i>tert</i> -butyldimethylsilyl)- <i>N</i> <sup>2</sup> -methyl- <i>N</i> <sup>2</sup> -[(2- <i>N,N</i> -dimethylamino)ethyl]-2'-deoxyguanosine ( <b>4f</b> ) in CDCl <sub>3</sub> | S16  |

|                                                                                                                                                                                                                                                                                     |     |
|-------------------------------------------------------------------------------------------------------------------------------------------------------------------------------------------------------------------------------------------------------------------------------------|-----|
| <sup>13</sup> C NMR spectrum of <i>O</i> <sup>6</sup> -benzyl-3',5'-bis- <i>O</i> -( <i>tert</i> -butyldimethylsilyl)- <i>N</i> <sup>2</sup> -methyl- <i>N</i> <sup>2</sup> -[(2- <i>N,N</i> -dimethylamino)ethyl]-2'-deoxyguanosine ( <b>4f</b> ) in CDCl <sub>3</sub>             | S17 |
| <sup>1</sup> H NMR spectrum of <i>O</i> <sup>6</sup> -benzyl-3',5'-bis- <i>O</i> -( <i>tert</i> -butyldimethylsilyl)- <i>N</i> <sup>2</sup> -propyl-2'-deoxyguanosine ( <b>4g</b> ) in CDCl <sub>3</sub>                                                                            | S18 |
| <sup>13</sup> C NMR spectrum of <i>O</i> <sup>6</sup> -benzyl-3',5'-bis- <i>O</i> -( <i>tert</i> -butyldimethylsilyl)- <i>N</i> <sup>2</sup> -propyl-2'-deoxyguanosine ( <b>4g</b> ) in CDCl <sub>3</sub>                                                                           | S19 |
| <sup>1</sup> H NMR spectrum of 3',5'-bis- <i>O</i> -( <i>tert</i> -butyldimethylsilyl)-2-(morpholin-4-yl)-2'-deoxyinosine ( <b>5a</b> ) in CDCl <sub>3</sub>                                                                                                                        | S20 |
| <sup>1</sup> H NMR spectrum of 3',5'-bis- <i>O</i> -( <i>tert</i> -butyldimethylsilyl)-2-(piperidin-1-yl)-2'-deoxyinosine ( <b>5b</b> ) in CDCl <sub>3</sub>                                                                                                                        | S21 |
| <sup>1</sup> H NMR spectrum of 3',5'-bis- <i>O</i> -( <i>tert</i> -butyldimethylsilyl)-2-(pyrrolidin-1-yl)-2'-deoxyinosine ( <b>5c</b> ) in CDCl <sub>3</sub>                                                                                                                       | S22 |
| <sup>1</sup> H NMR spectrum of 3',5'-bis- <i>O</i> -( <i>tert</i> -butyldimethylsilyl)-2-(1,4,dioxo-8-azaspiro[4.5]dec-8-yl)-2'-deoxyinosine ( <b>5d</b> ) in CDCl <sub>3</sub>                                                                                                     | S23 |
| <sup>1</sup> H NMR spectrum of 3',5'-bis- <i>O</i> -( <i>tert</i> -butyldimethylsilyl)- <i>N</i> <sup>2</sup> -methyl- <i>N</i> <sup>2</sup> -[(2- <i>N,N</i> -dimethylamino)ethyl]-2'-deoxyguanosine ( <b>5f</b> ) in CDCl <sub>3</sub>                                            | S24 |
| <sup>1</sup> H NMR spectrum of 3',5'-bis- <i>O</i> -( <i>tert</i> -butyldimethylsilyl)- <i>N</i> <sup>2</sup> -propyl-2'-deoxyguanosine ( <b>5g</b> ) in CDCl <sub>3</sub>                                                                                                          | S25 |
| <sup>1</sup> H NMR spectrum of <i>O</i> <sup>6</sup> -benzyl- <i>N</i> <sup>2</sup> -(3-benzyloxy-1-propyl)-3',5'-bis- <i>O</i> -( <i>tert</i> -butyldimethylsilyl)-2'-deoxyguanosine ( <b>7</b> ) in CDCl <sub>3</sub>                                                             | S26 |
| <sup>13</sup> C NMR spectrum of <i>O</i> <sup>6</sup> -benzyl- <i>N</i> <sup>2</sup> -(3-benzyloxy-1-propyl)-3',5'-bis- <i>O</i> -( <i>tert</i> -butyldimethylsilyl)-2'-deoxyguanosine ( <b>7</b> ) in CDCl <sub>3</sub>                                                            | S27 |
| <sup>1</sup> H NMR spectrum of 3',5'-bis- <i>O</i> -( <i>tert</i> -butyldimethylsilyl)- <i>N</i> <sup>2</sup> -(3-hydroxy-1-propyl)-2'-deoxyguanosine ( <b>8</b> ) in CDCl <sub>3</sub>                                                                                             | S28 |
| <sup>13</sup> C NMR spectrum of 3',5'-bis- <i>O</i> -( <i>tert</i> -butyldimethylsilyl)- <i>N</i> <sup>2</sup> -(3-hydroxy-1-propyl)-2'-deoxyguanosine ( <b>8</b> ) in CDCl <sub>3</sub>                                                                                            | S29 |
| <sup>1</sup> H NMR spectrum of ~1:1 diastereomeric mixture of 3-[3,5-bis- <i>O</i> -( <i>tert</i> -butyldimethylsilyl)-2-deoxy-β- <i>D</i> - <i>erythro</i> -pentofuranosyl]-8-hydroxy-5,6,7,8-pyrimido[1,2- <i>a</i> ]purin-10(3 <i>H</i> )-one ( <b>9</b> ) in CDCl <sub>3</sub>  | S30 |
| <sup>13</sup> C NMR spectrum of ~1:1 diastereomeric mixture of 3-[3,5-bis- <i>O</i> -( <i>tert</i> -butyldimethylsilyl)-2-deoxy-β- <i>D</i> - <i>erythro</i> -pentofuranosyl]-8-hydroxy-5,6,7,8-pyrimido[1,2- <i>a</i> ]purin-10(3 <i>H</i> )-one ( <b>9</b> ) in CDCl <sub>3</sub> | S31 |

SB-1205-07-57-column-1H

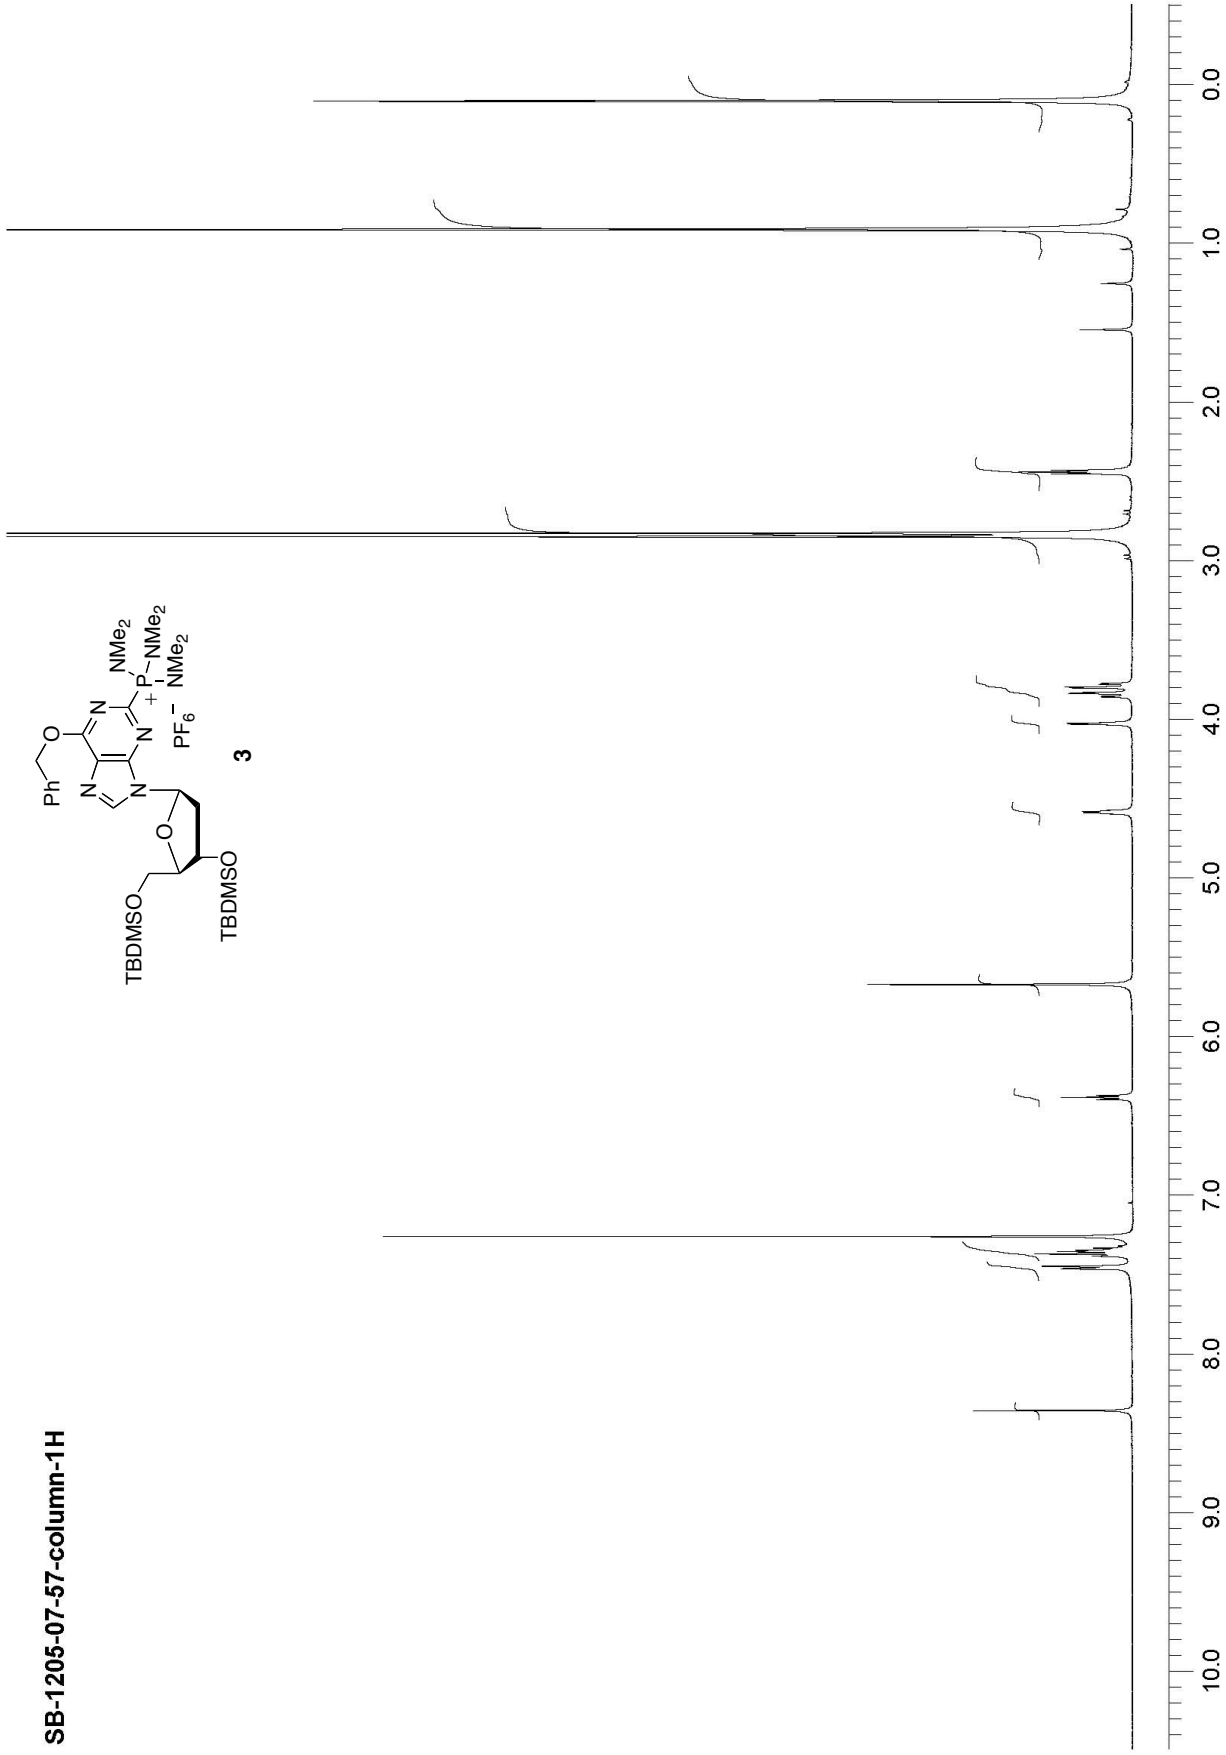

SB-1205-04-74-column-C13

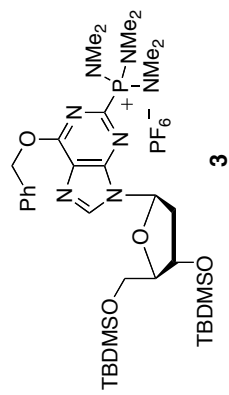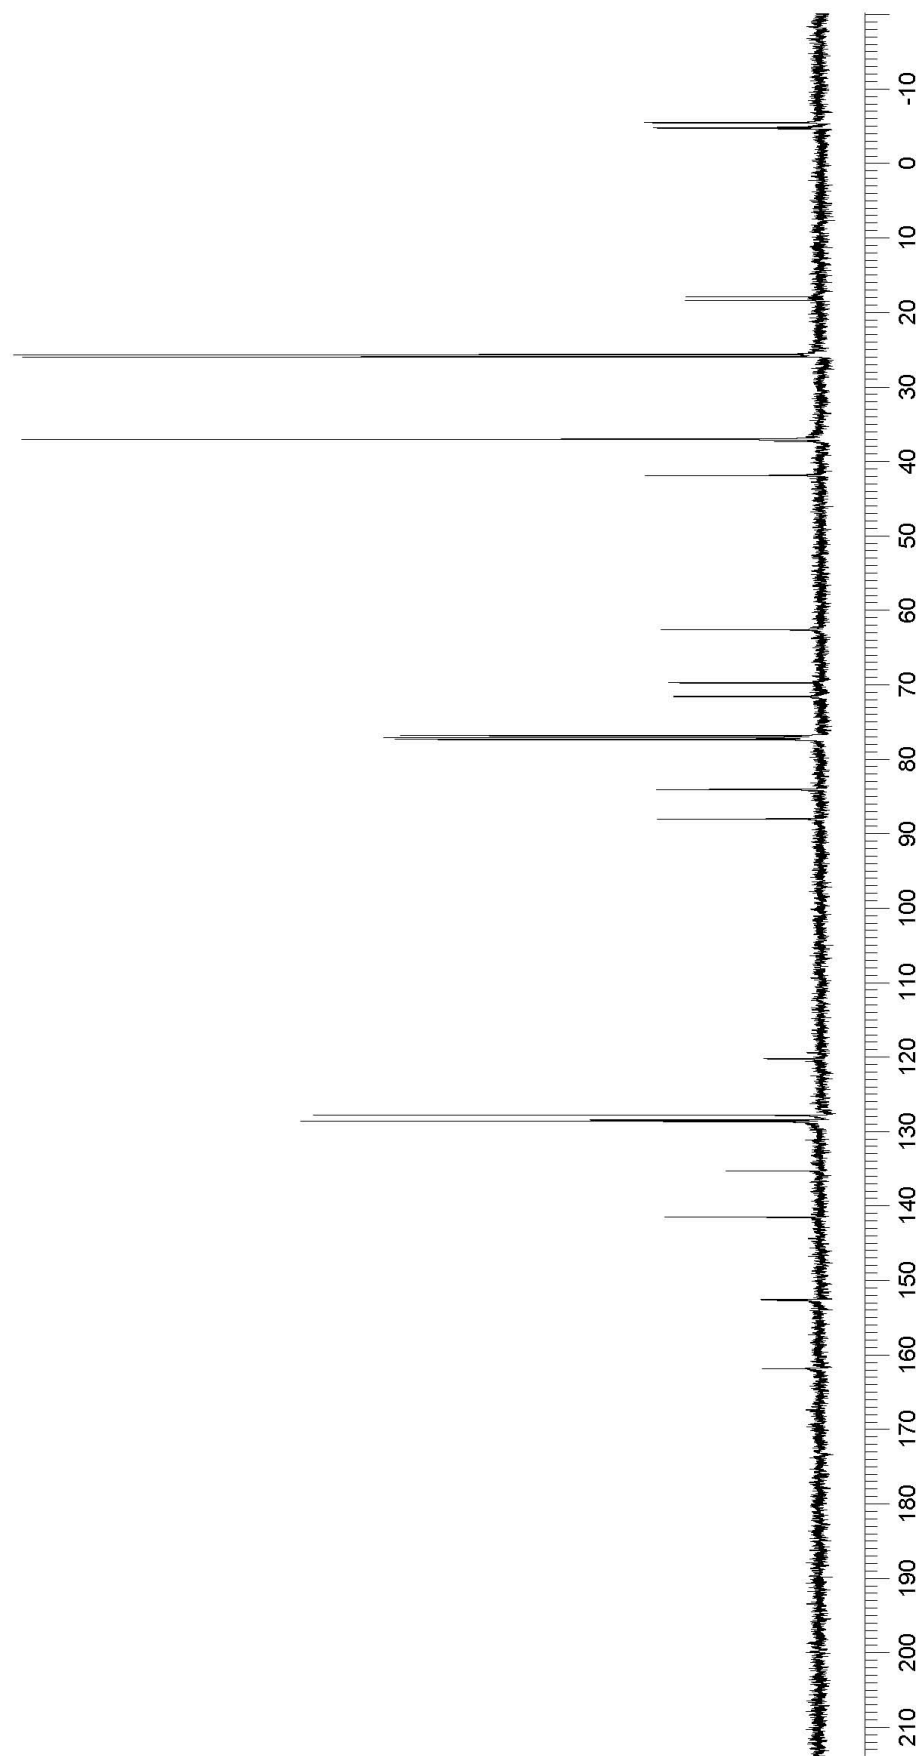

SB-1205-07-57-column-P31

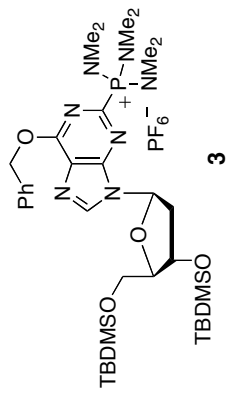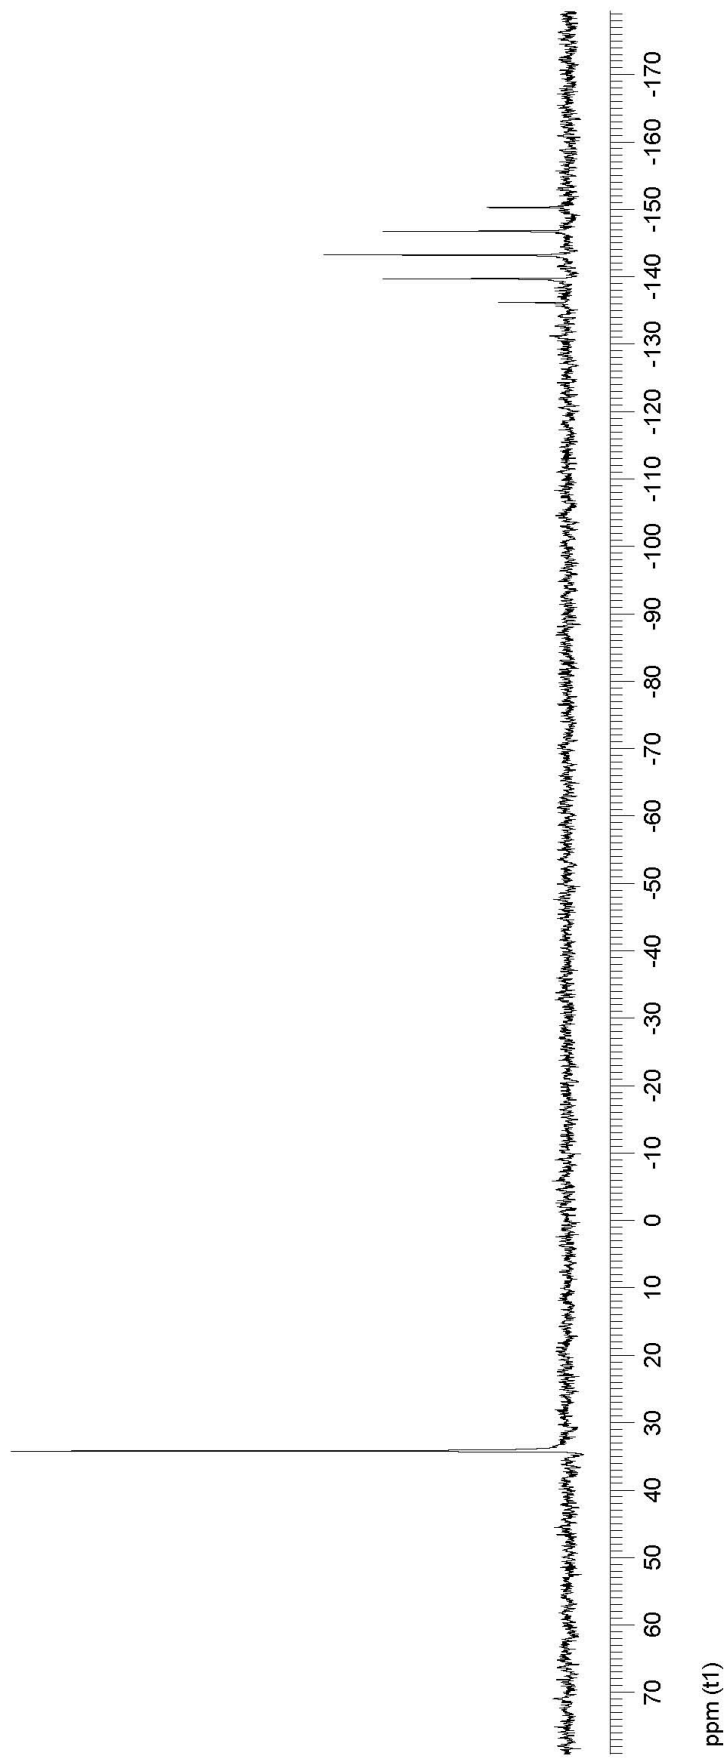

SB-1205-05-09-1H

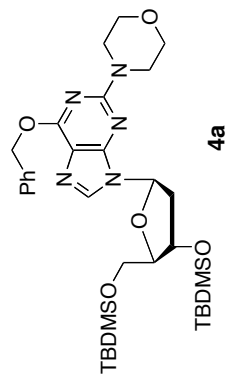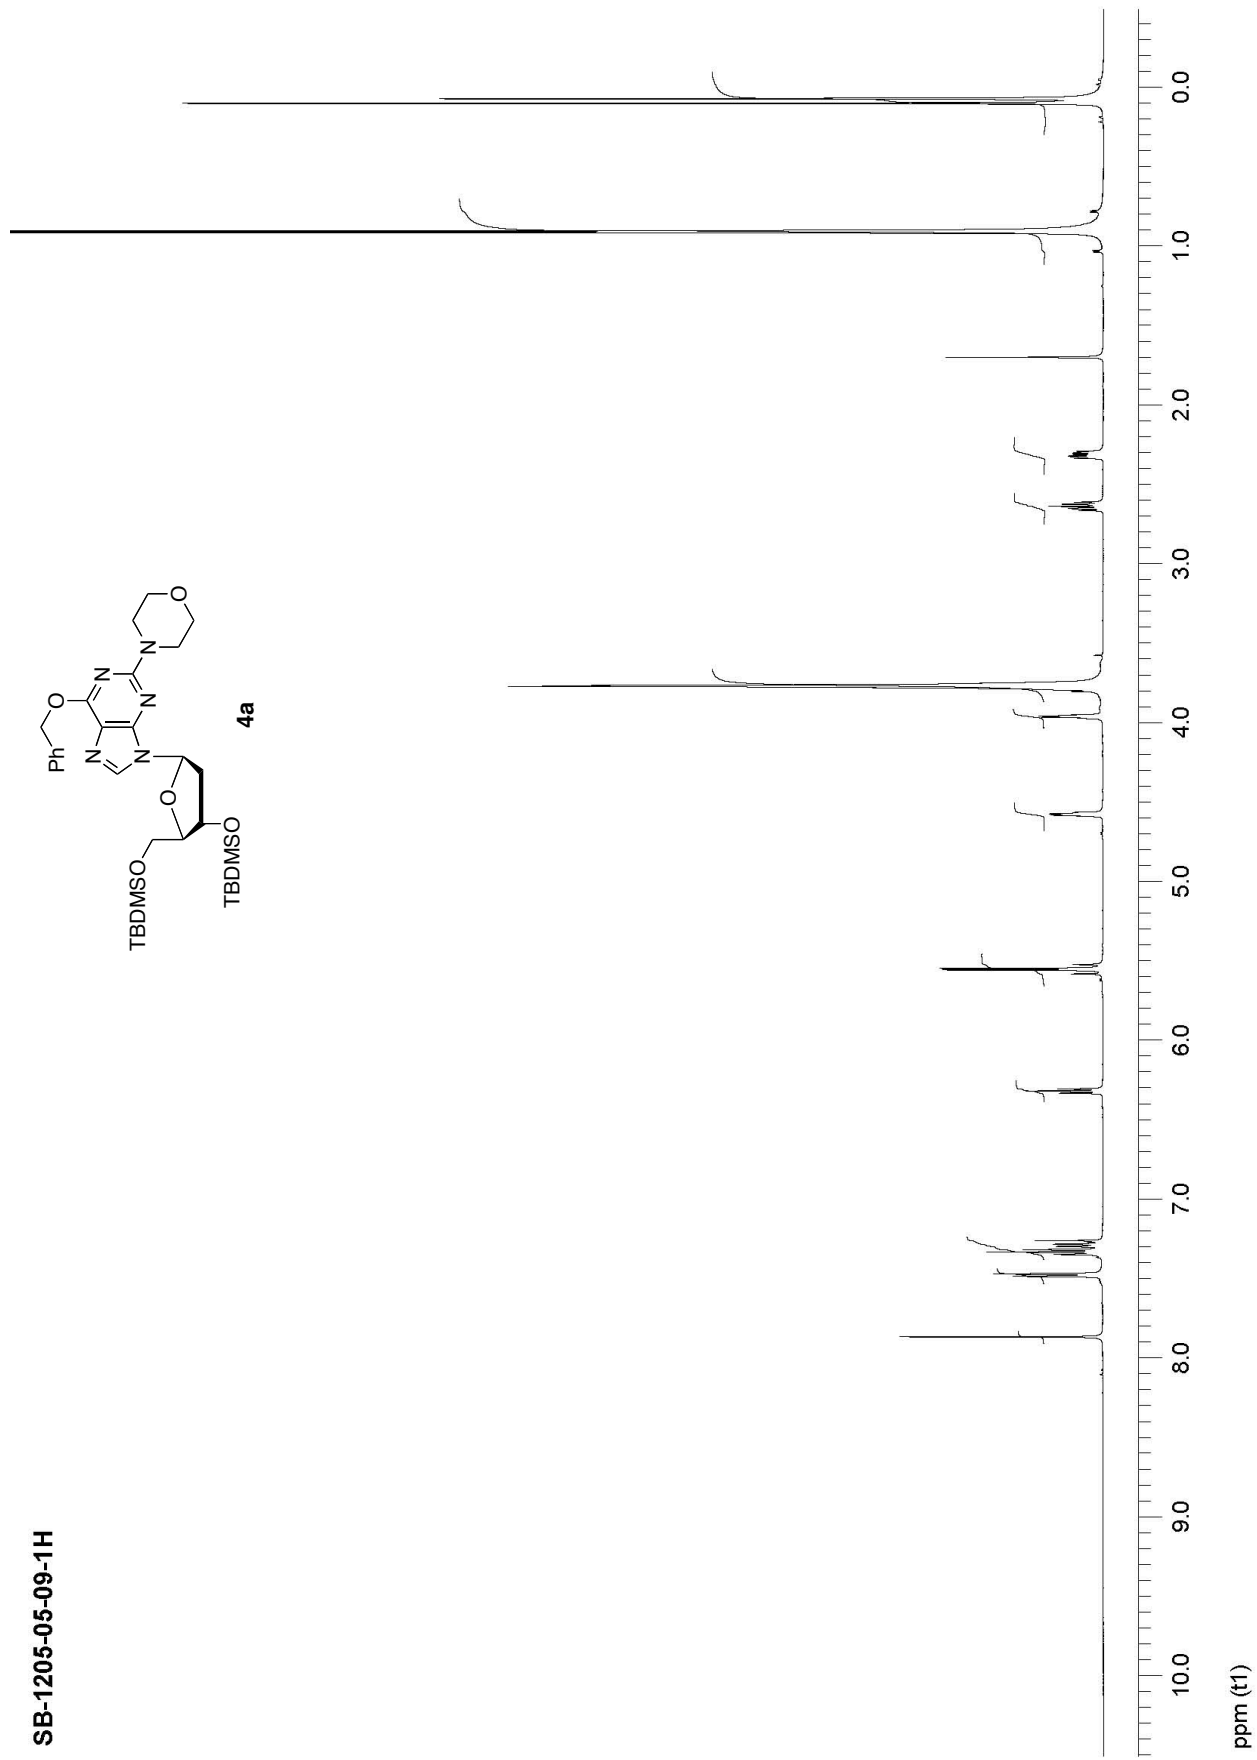

SB-1205-05-09-13C

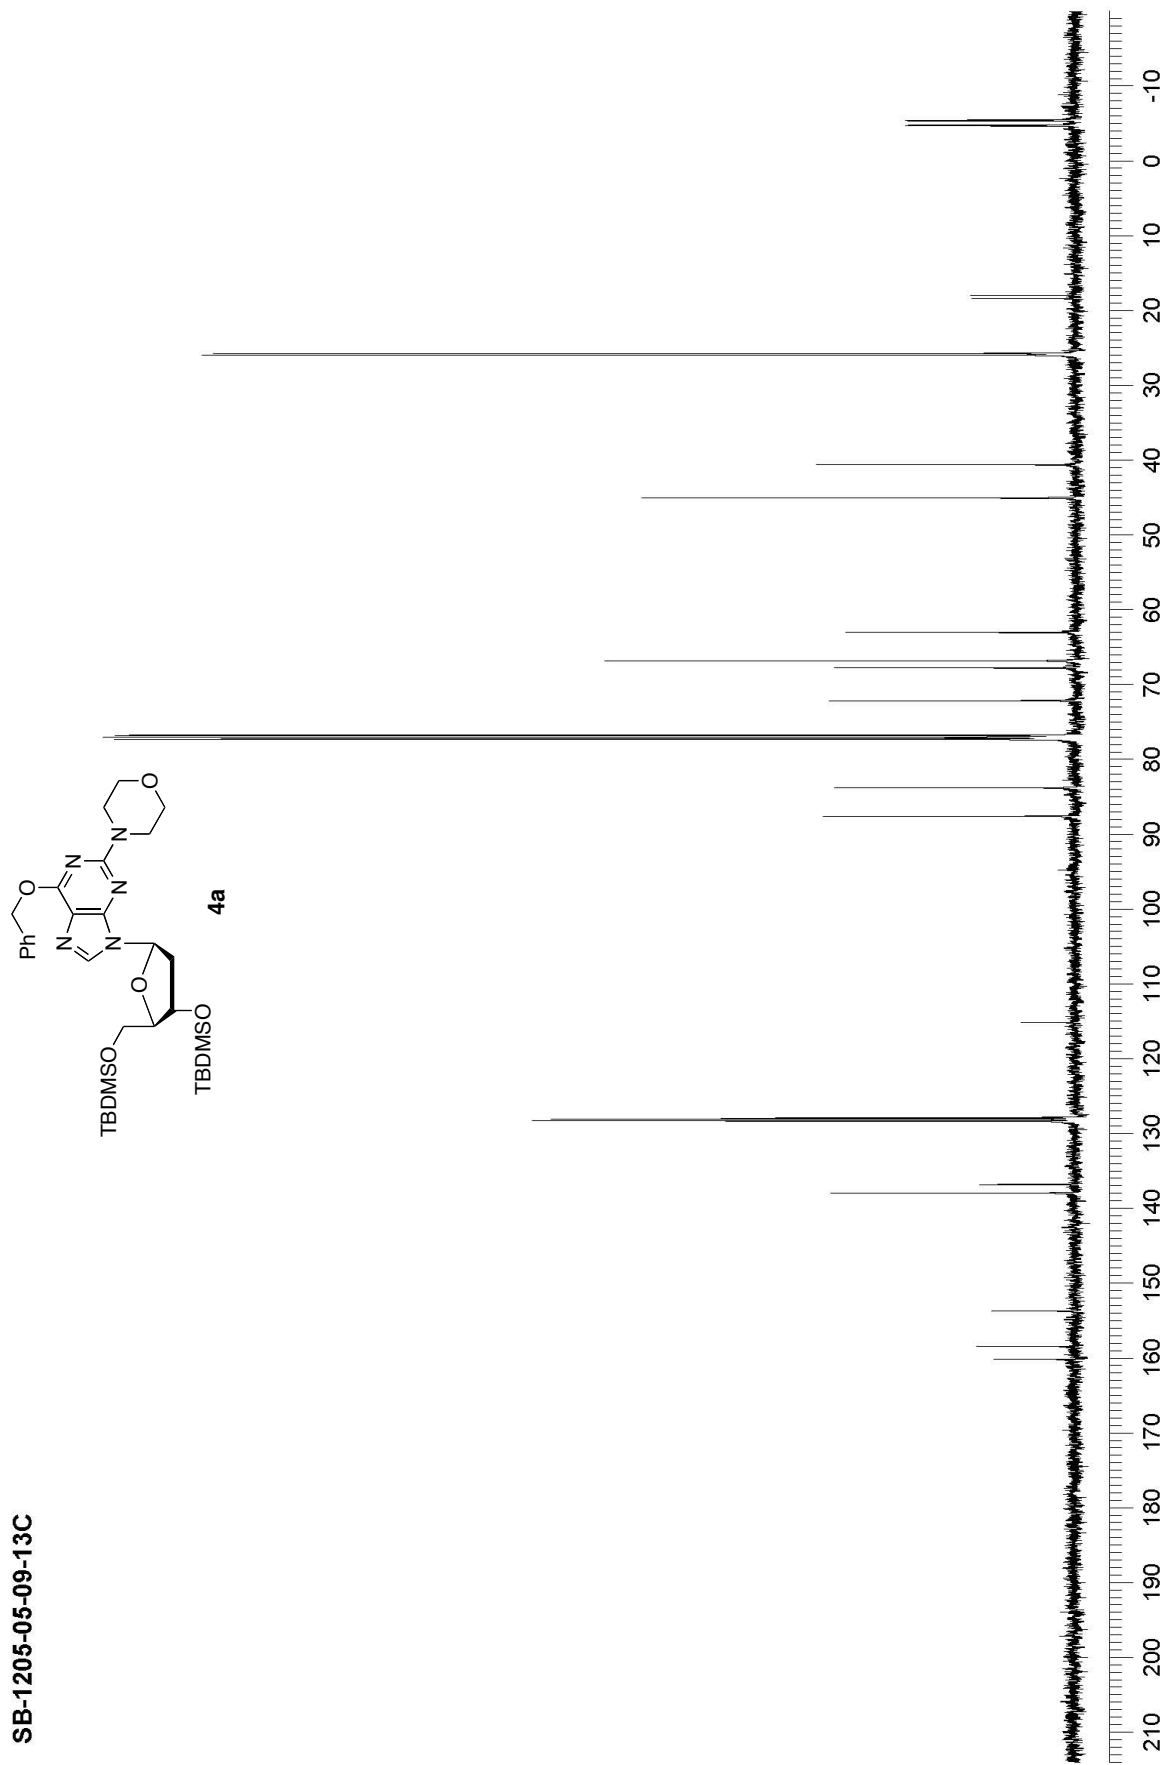

ppm (t1)

SB-1205-07-12-1H

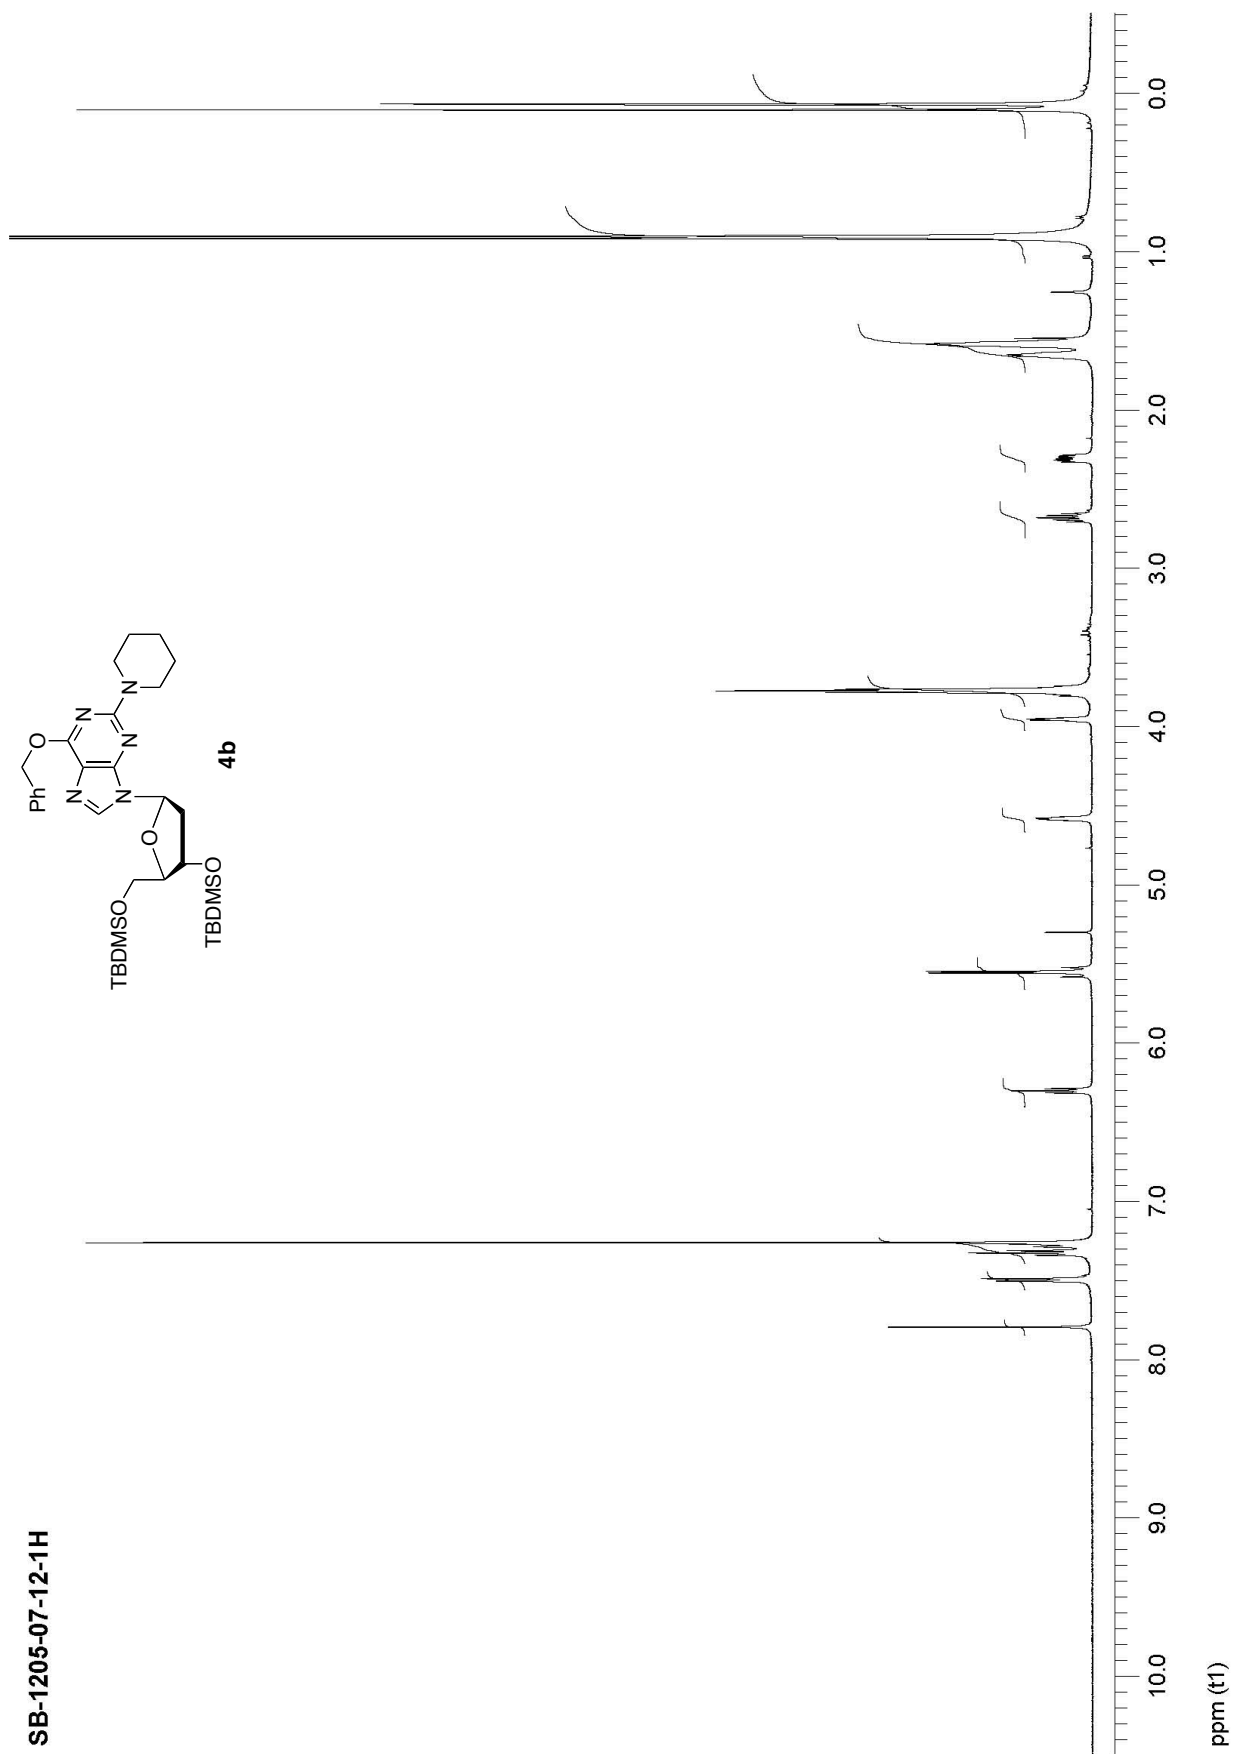



SB-1205-07-12-13C

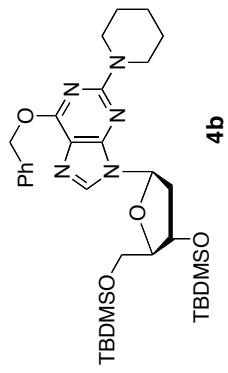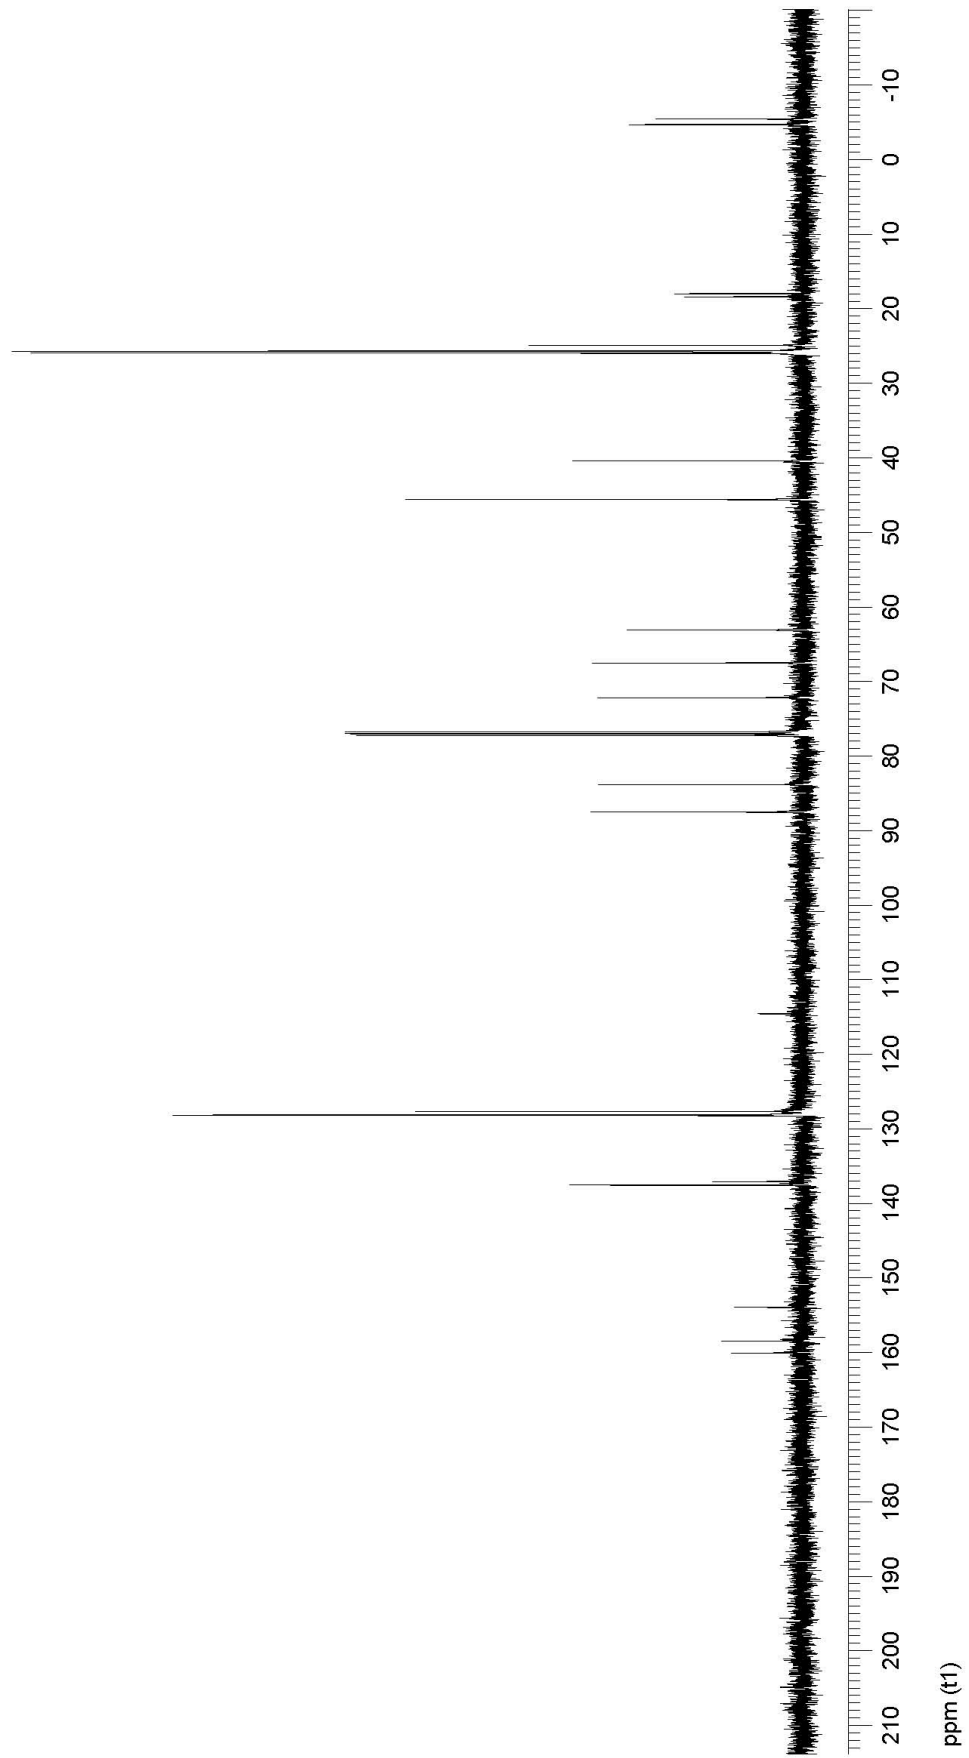

SB-1205-07-13-1H

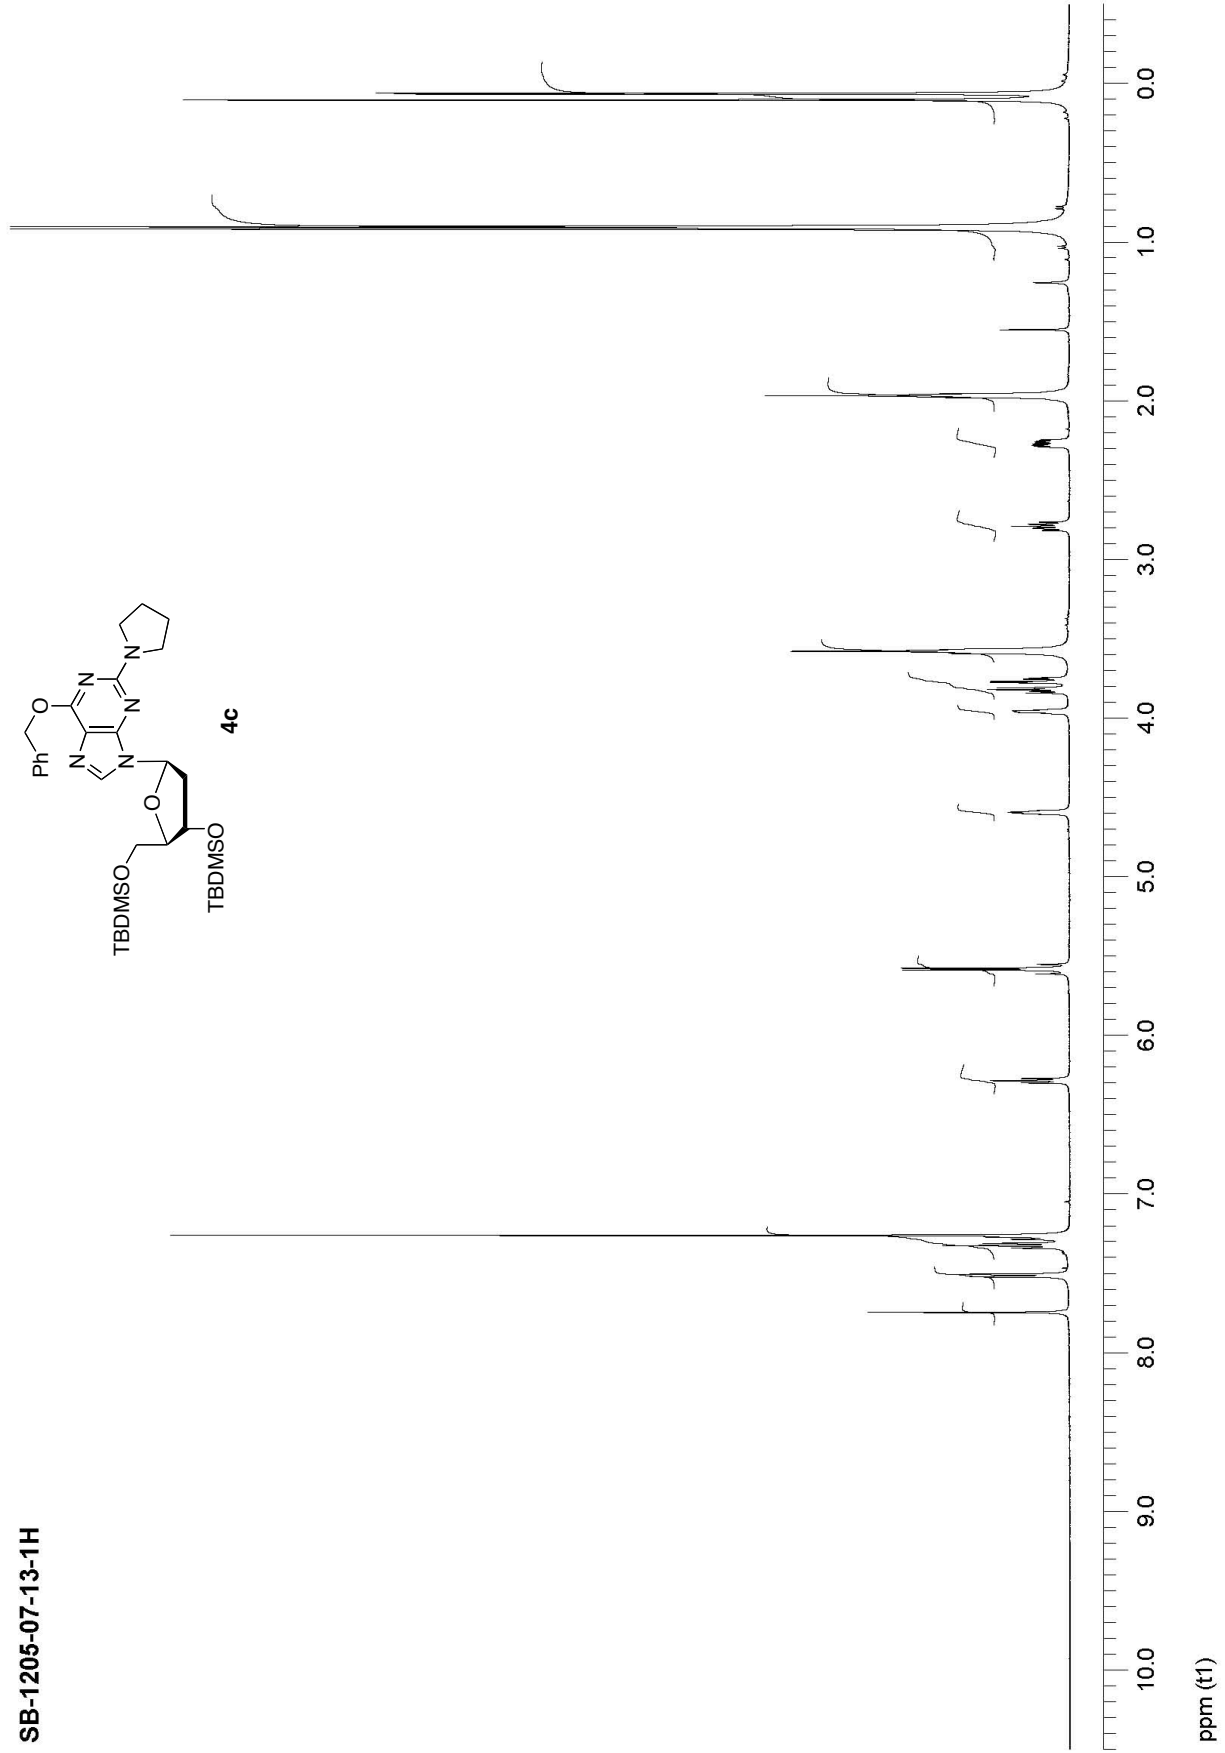

SB-1205-07-13-13C

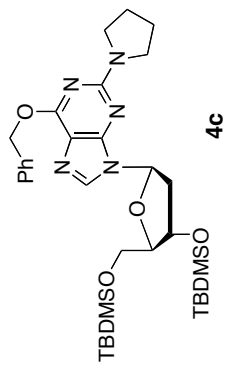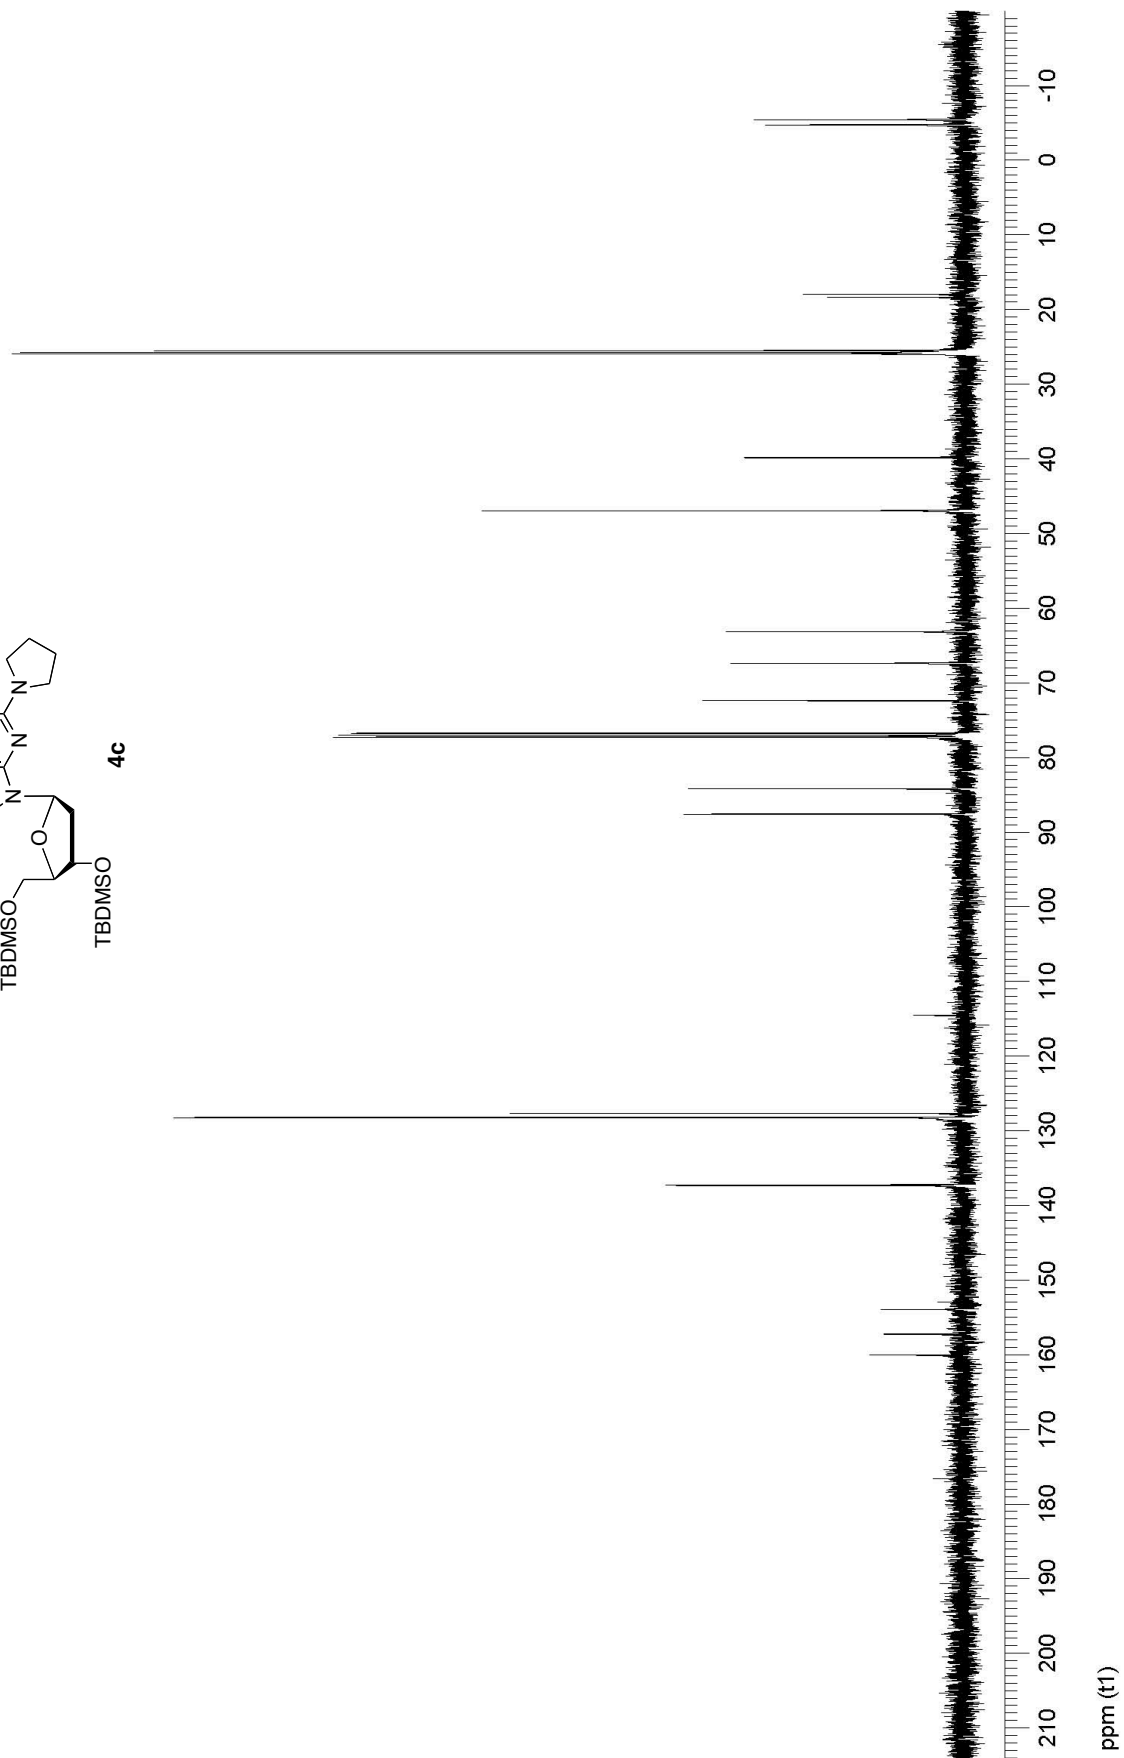

SB-1205-07-14-1H

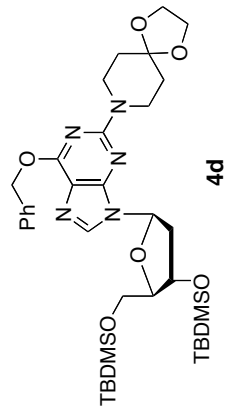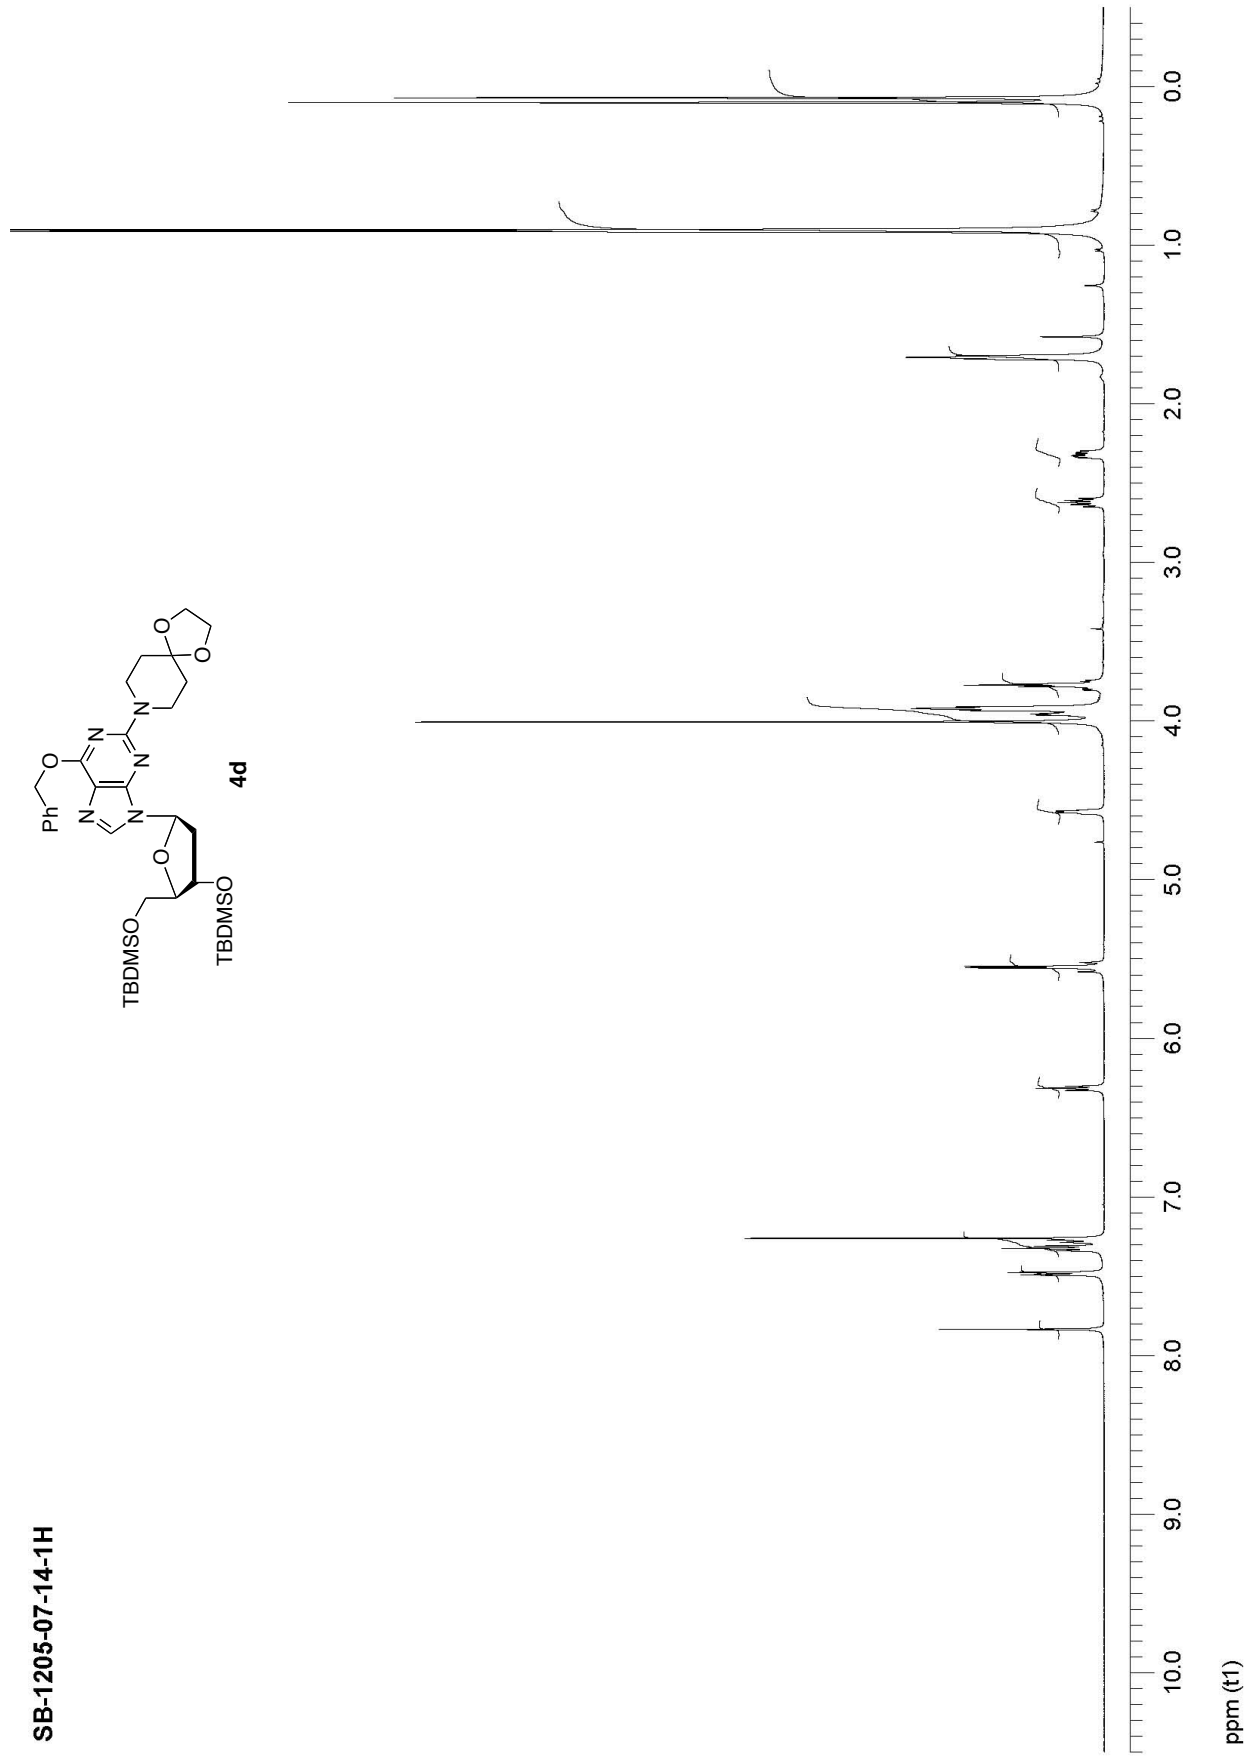

SB-1205-07-14-13C

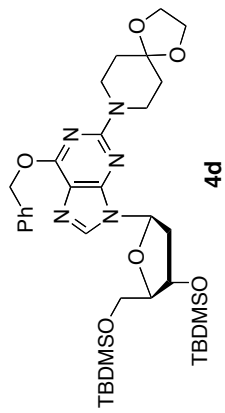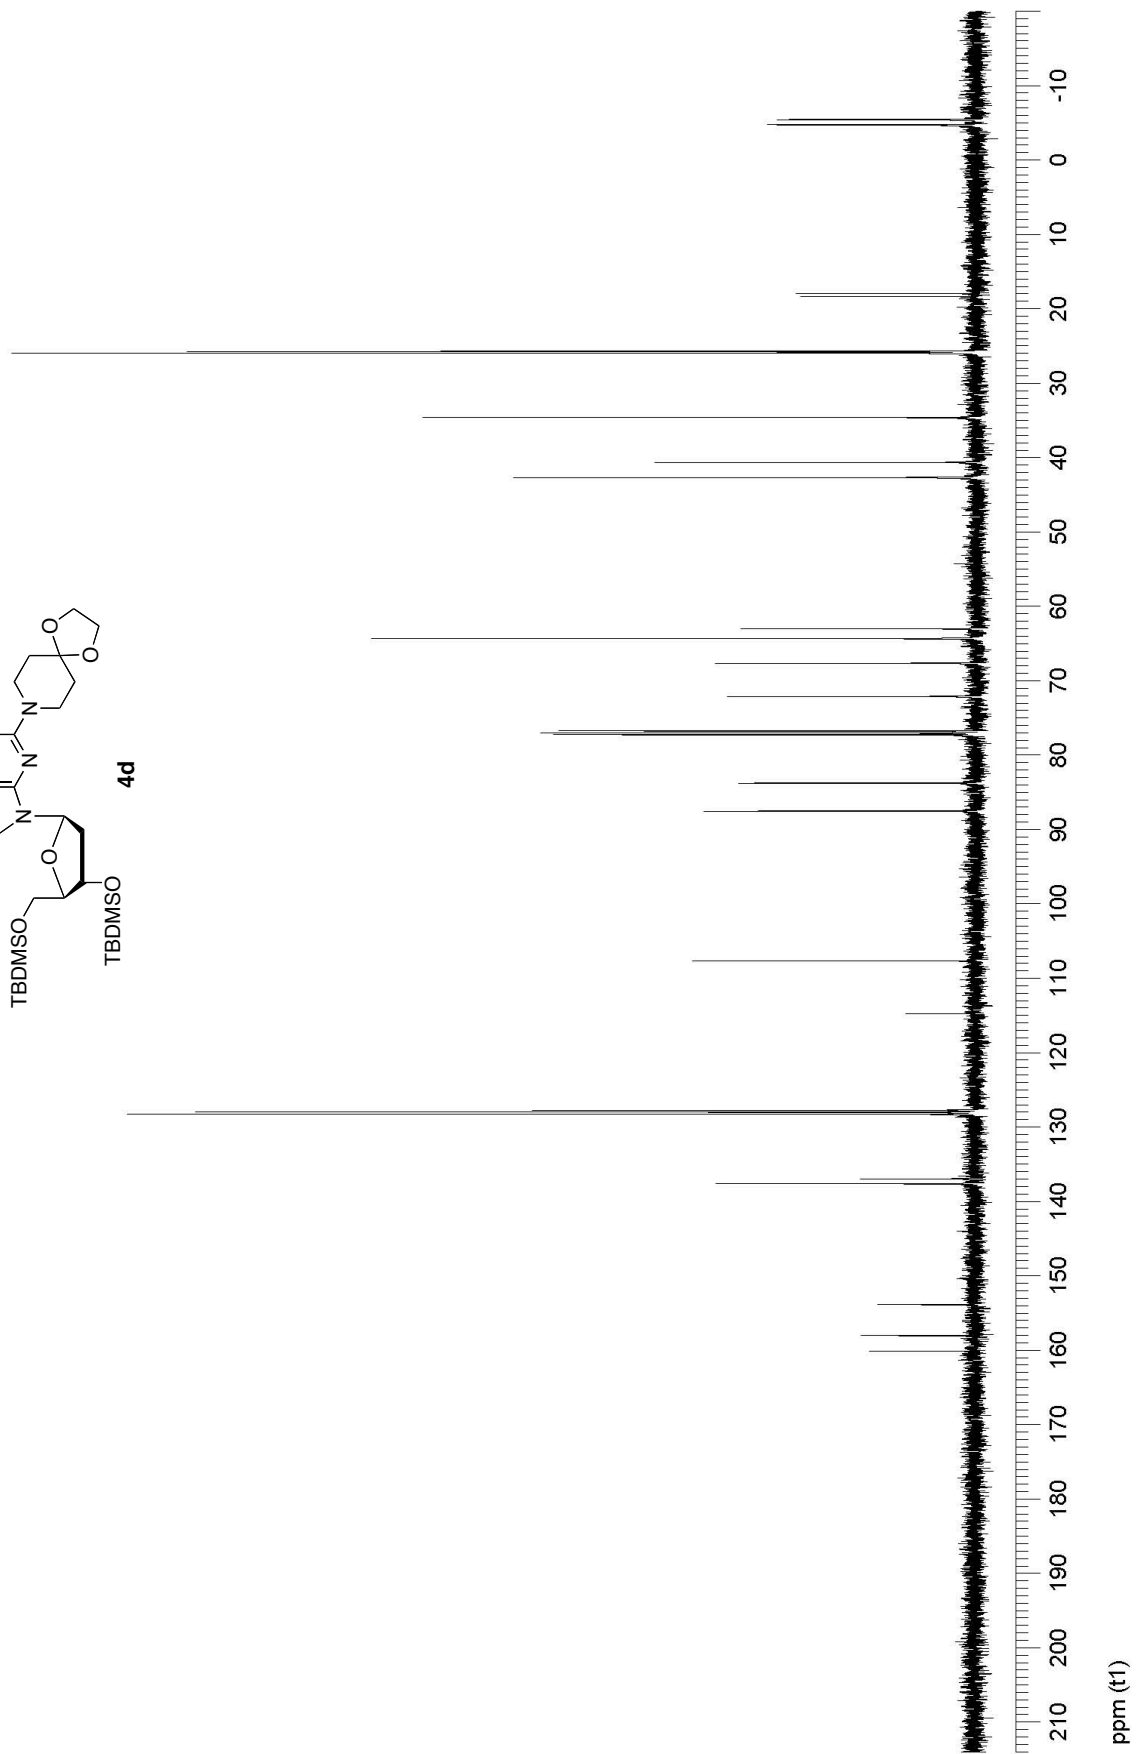

ppm (t1)

SB-1205-07-15-column-1H

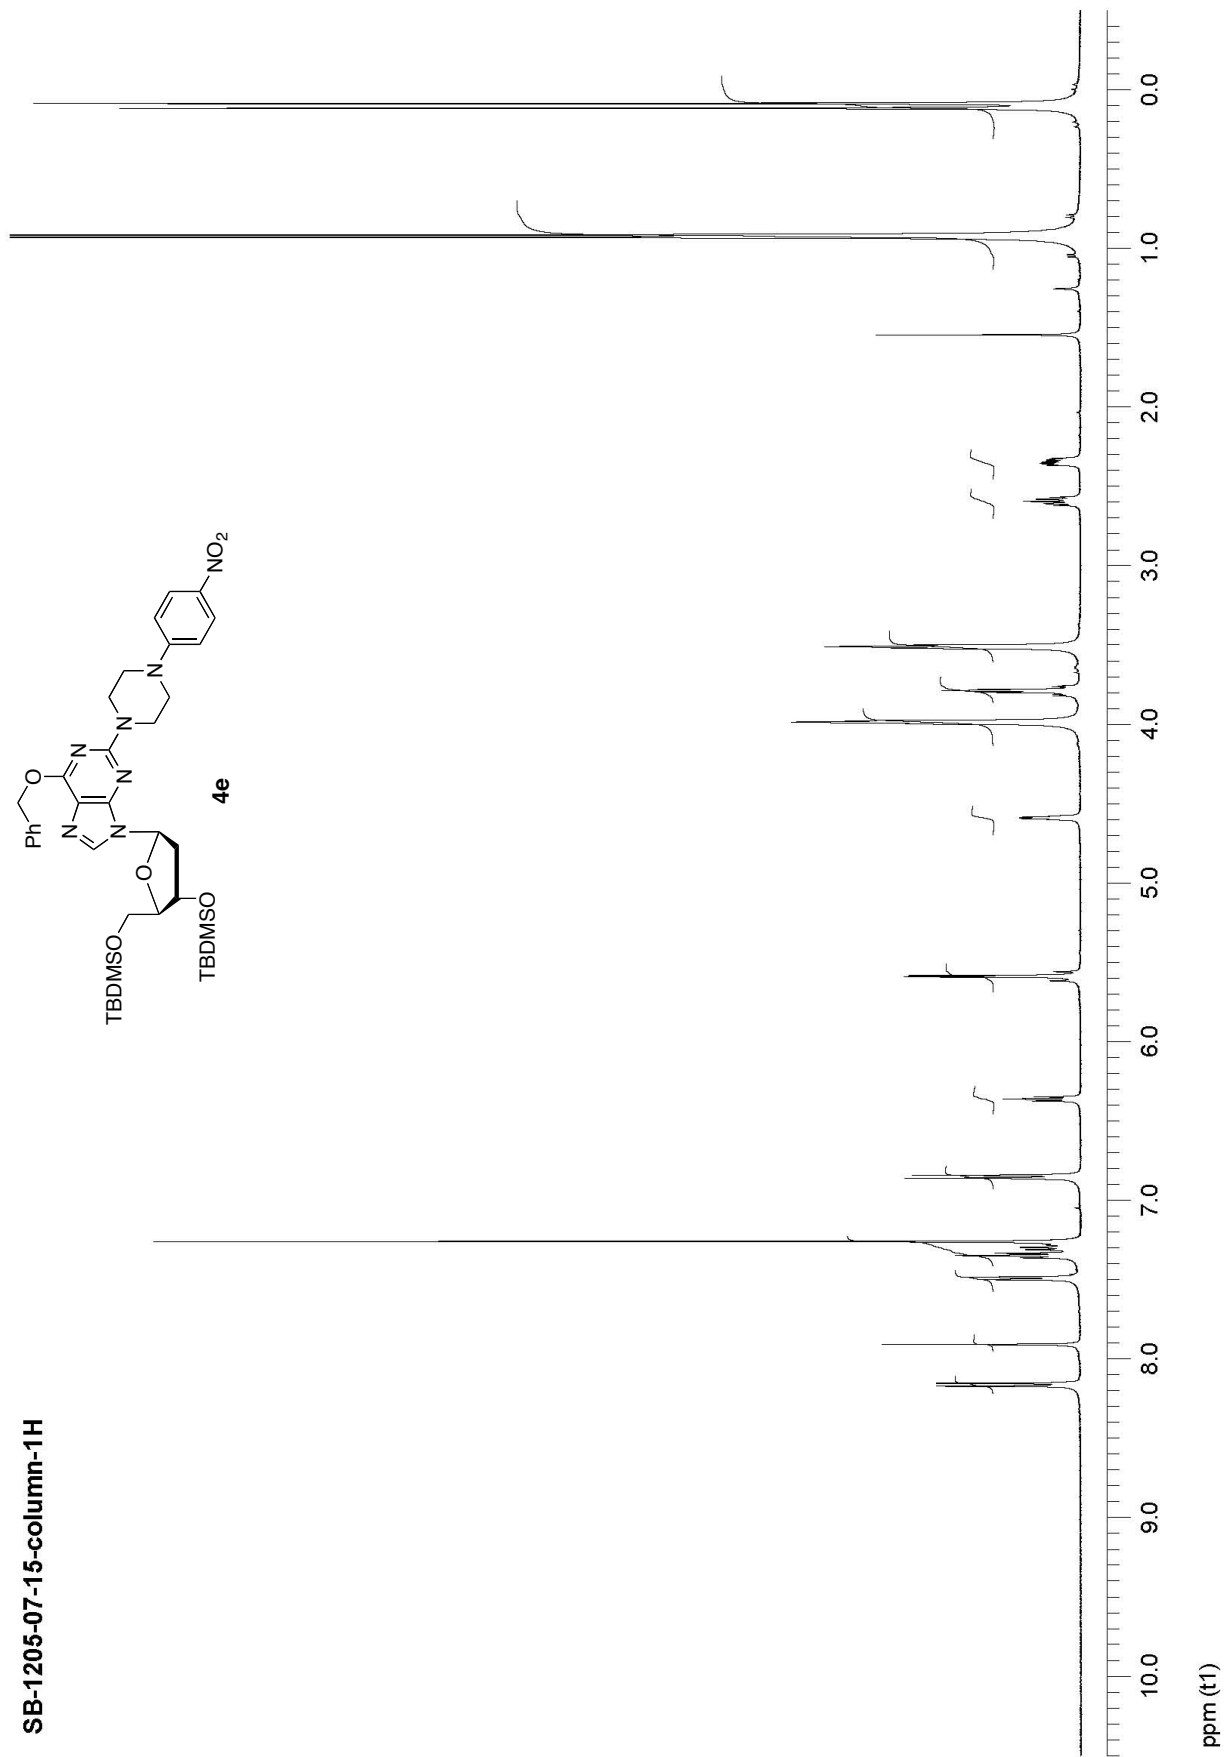

SB-1205-07-15-column-13C

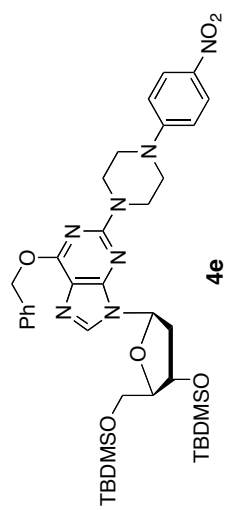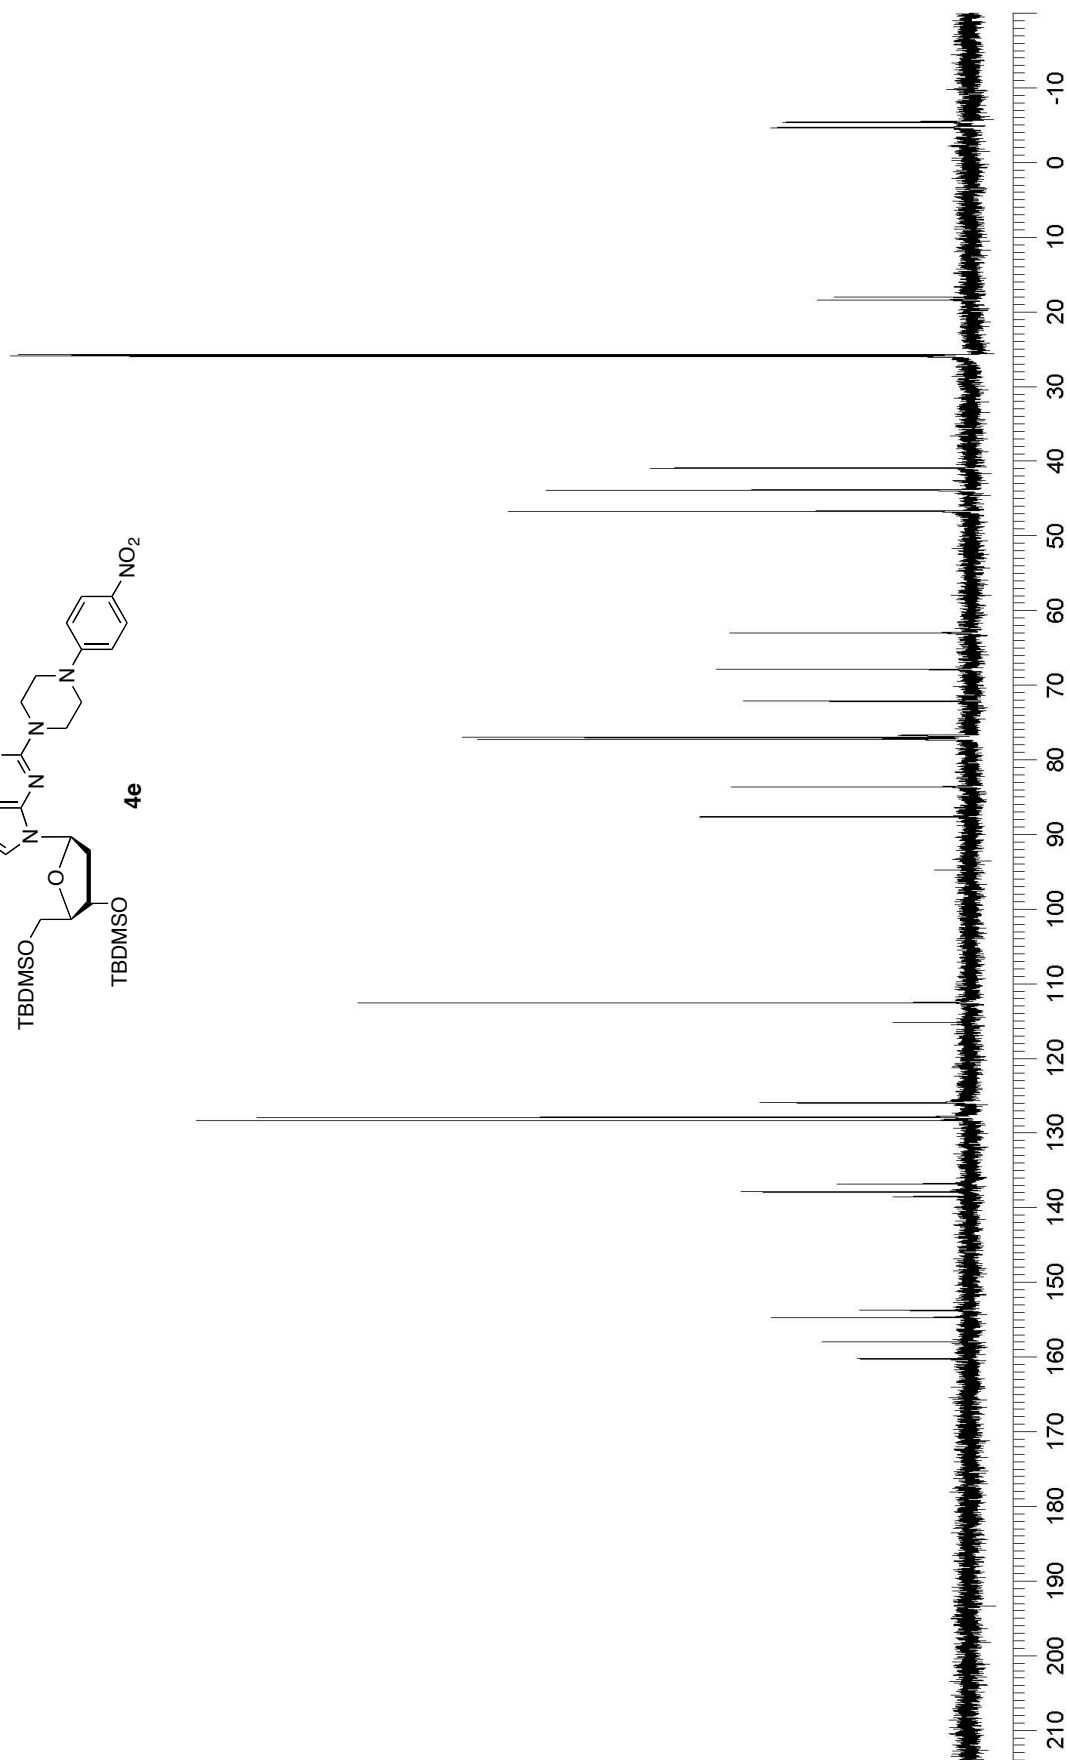

ppm (t1)

SB-1205-07-16-column-1H

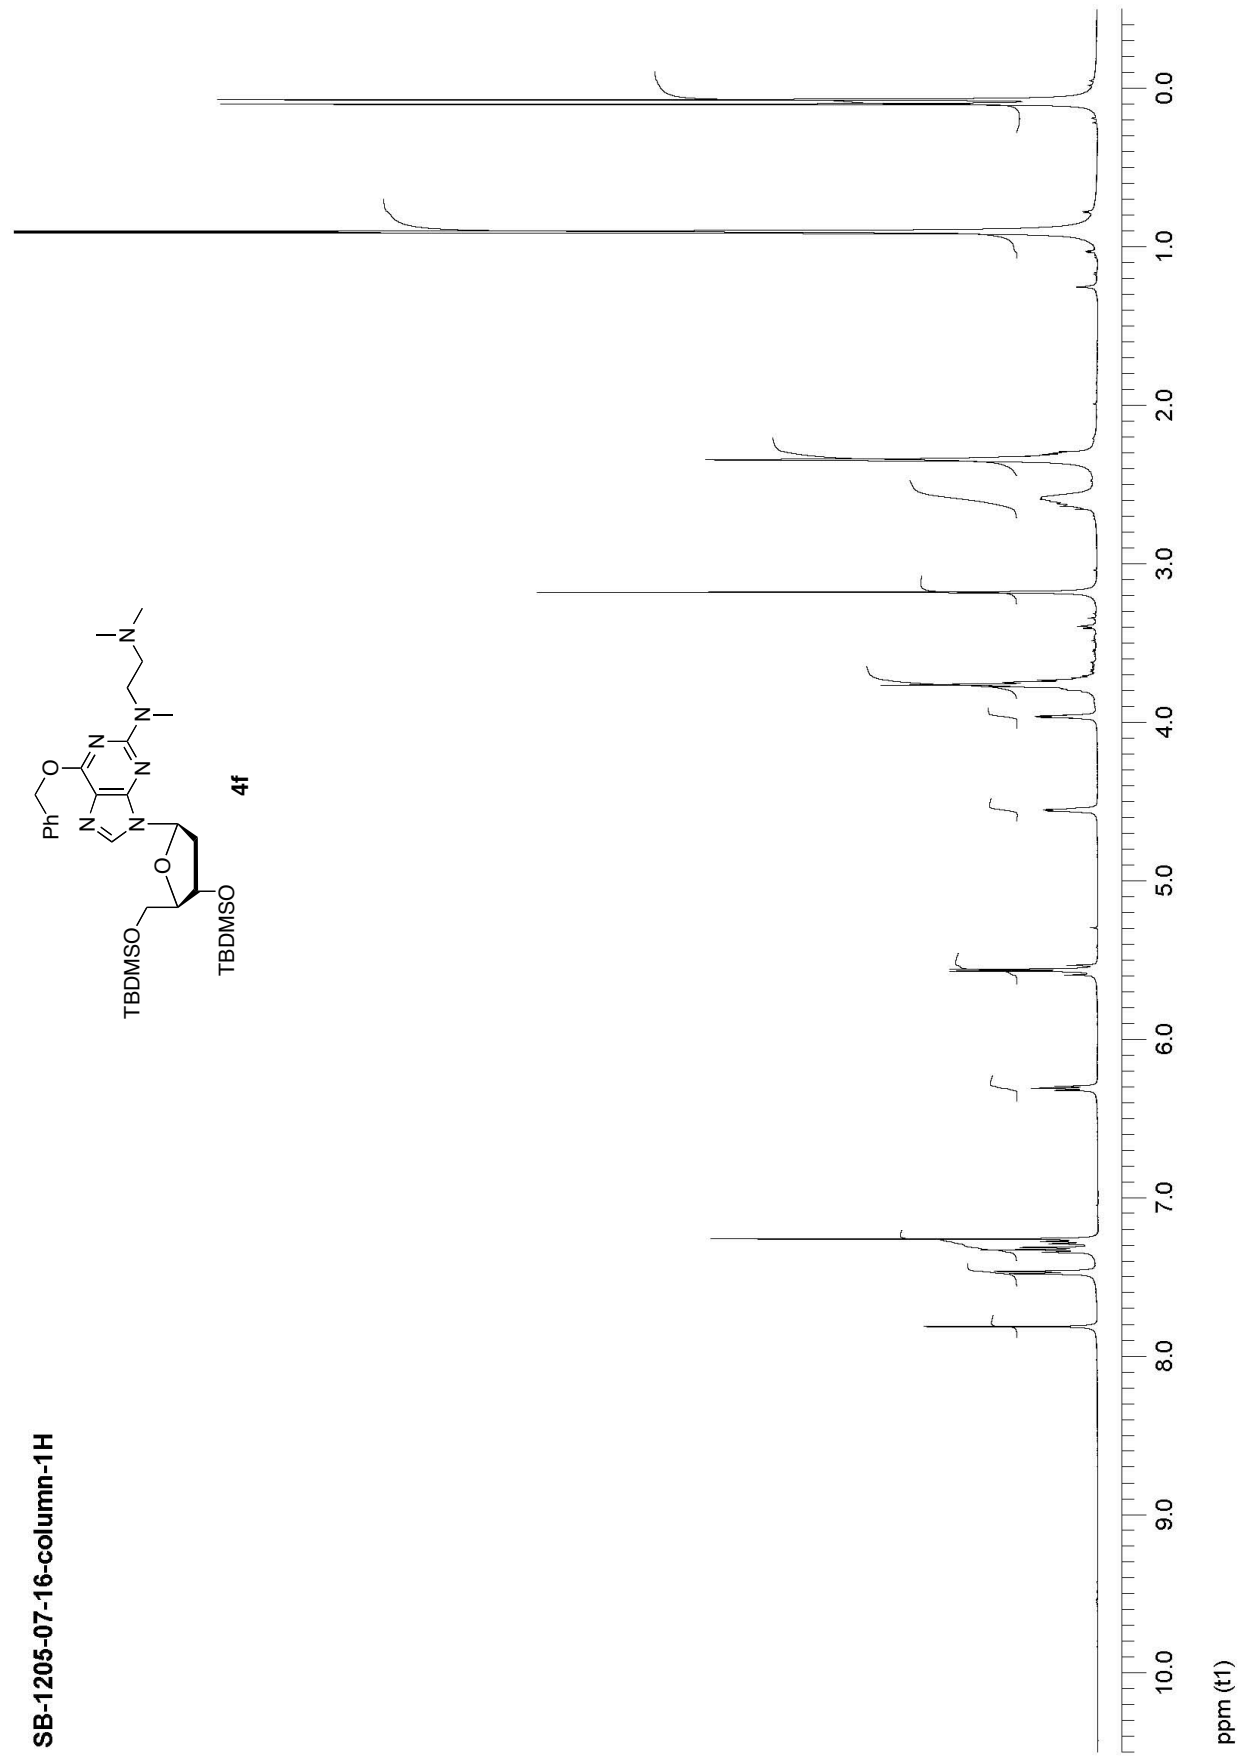



SB-1205-07-16-column-13C

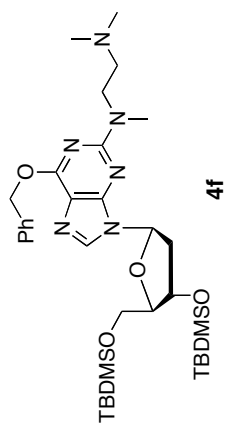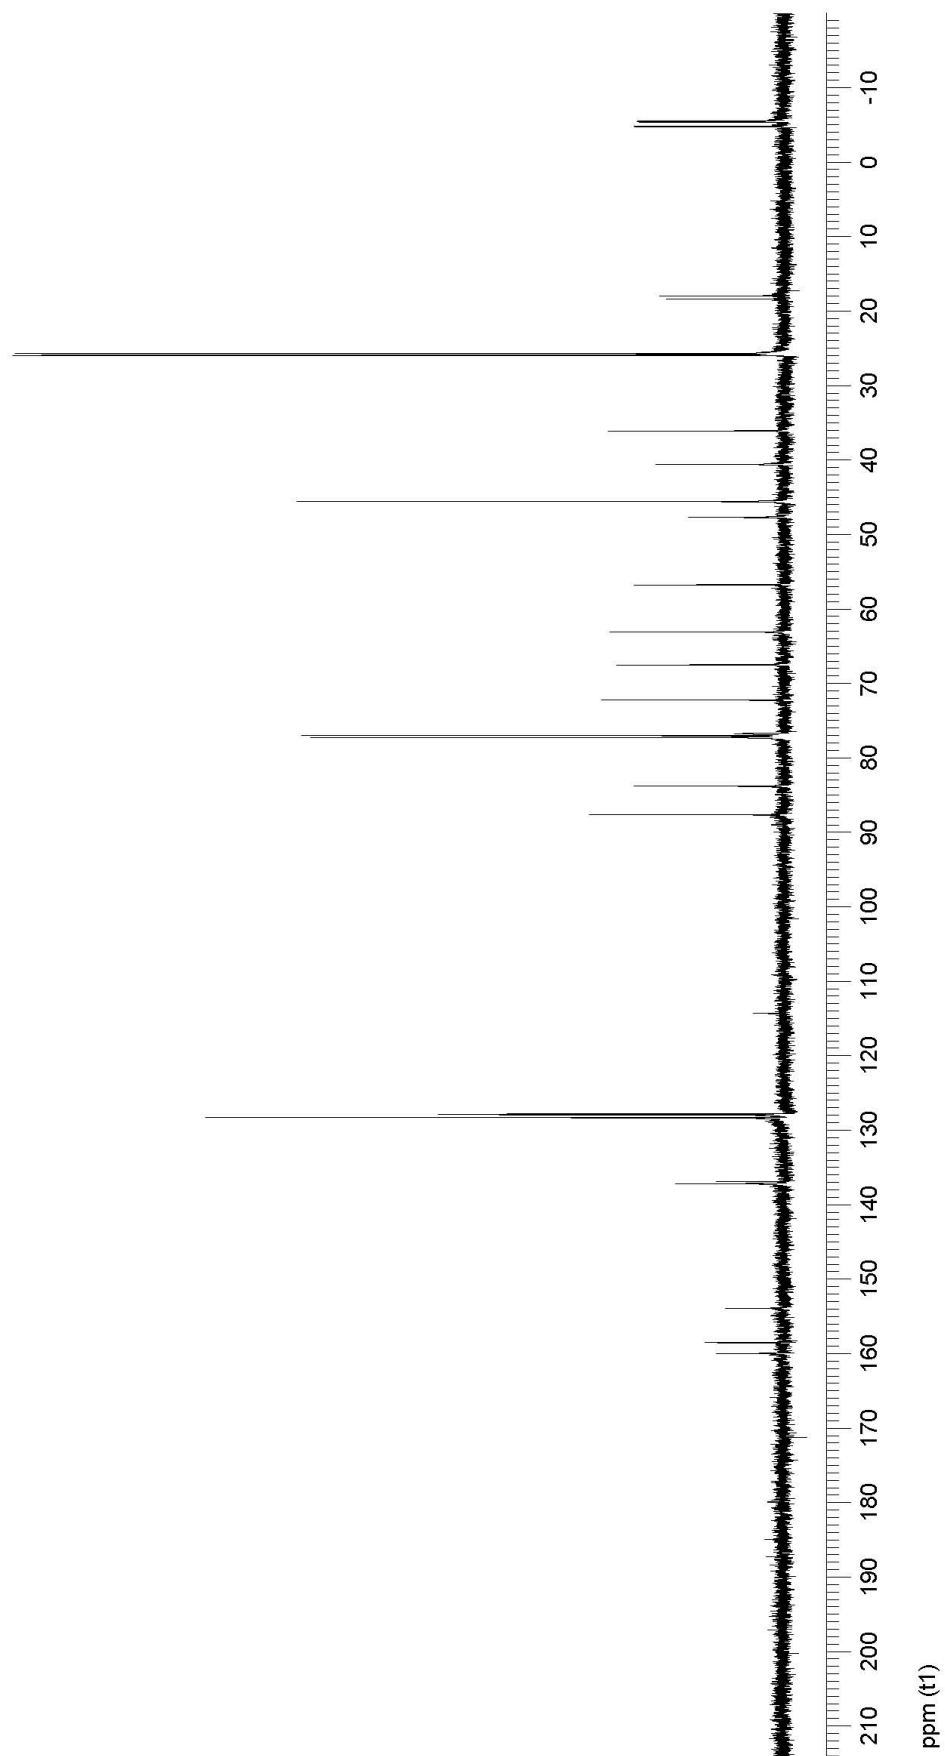

SB-1205-07-17-1H

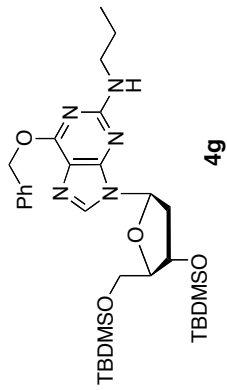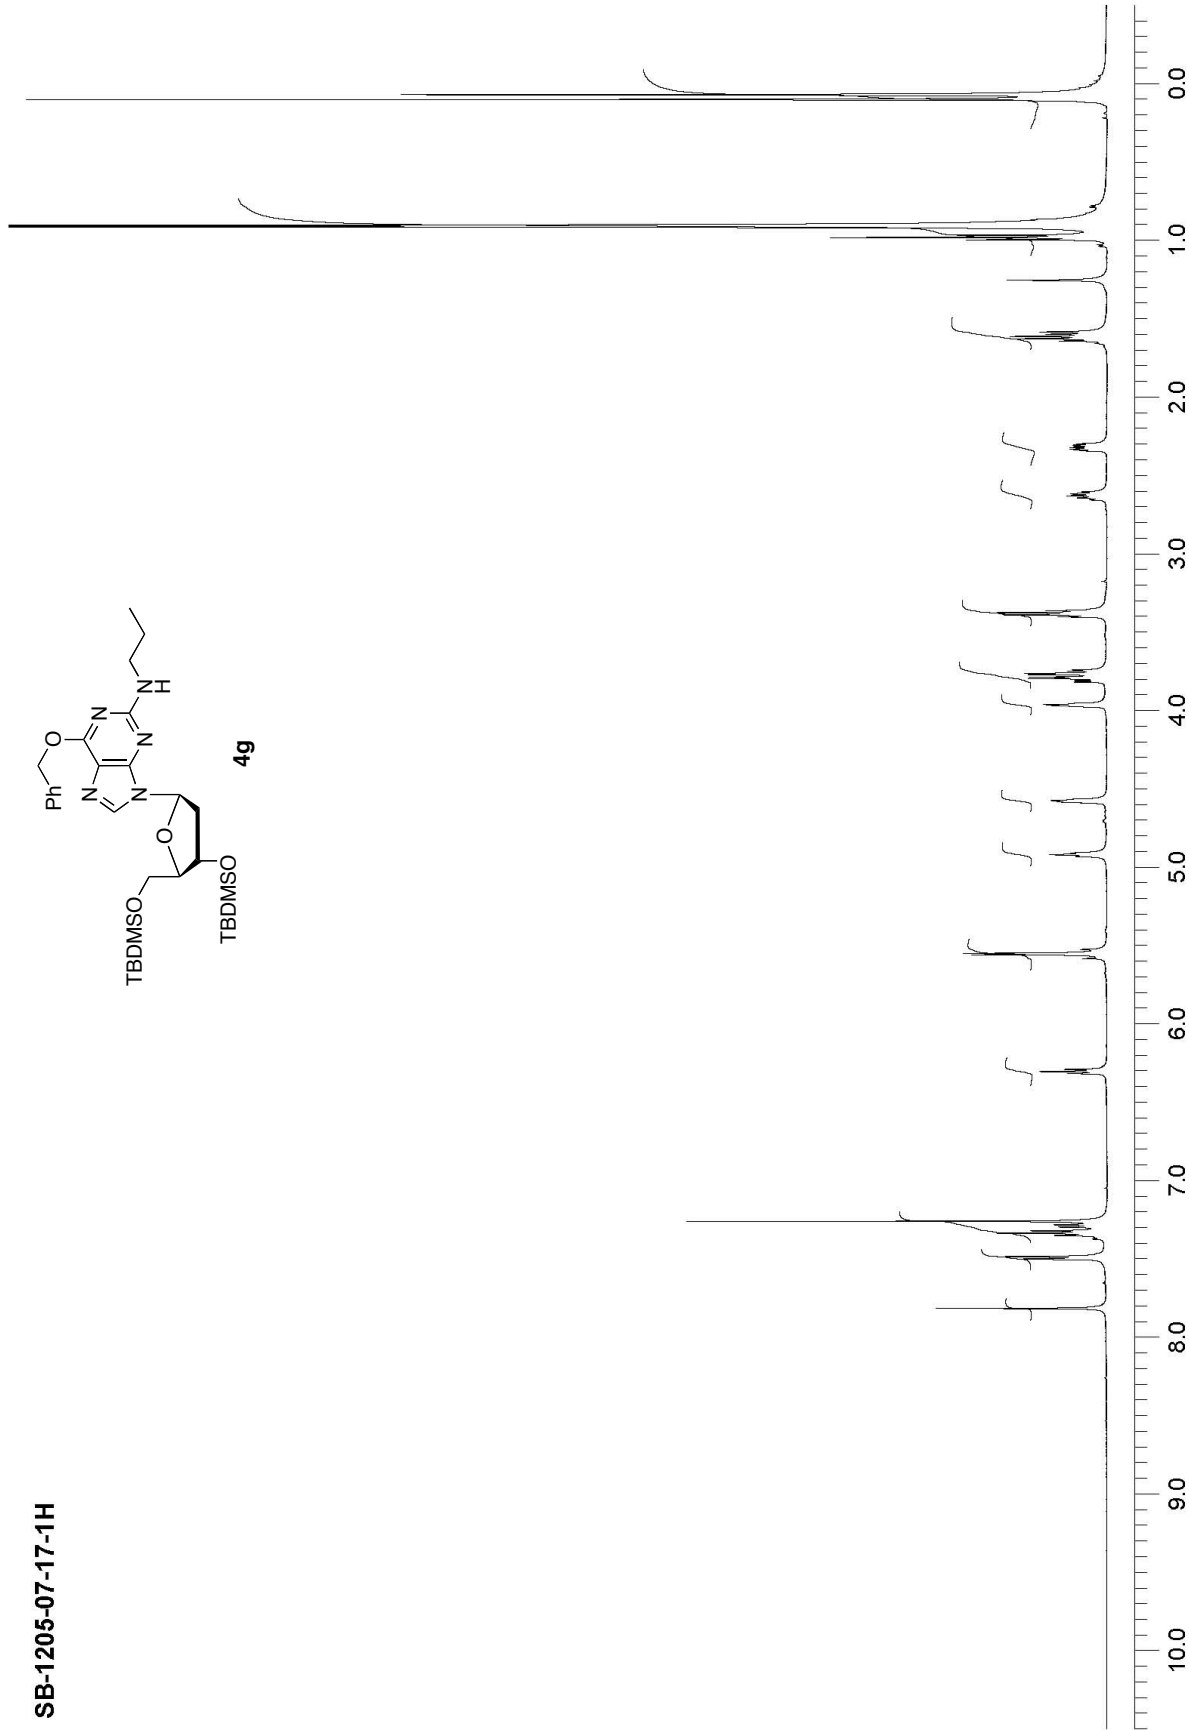

ppm (t1)

SB-1205-07-17-13c

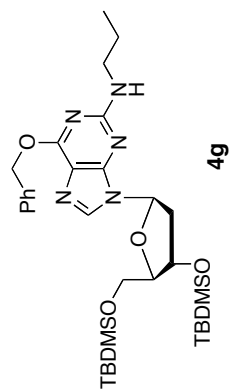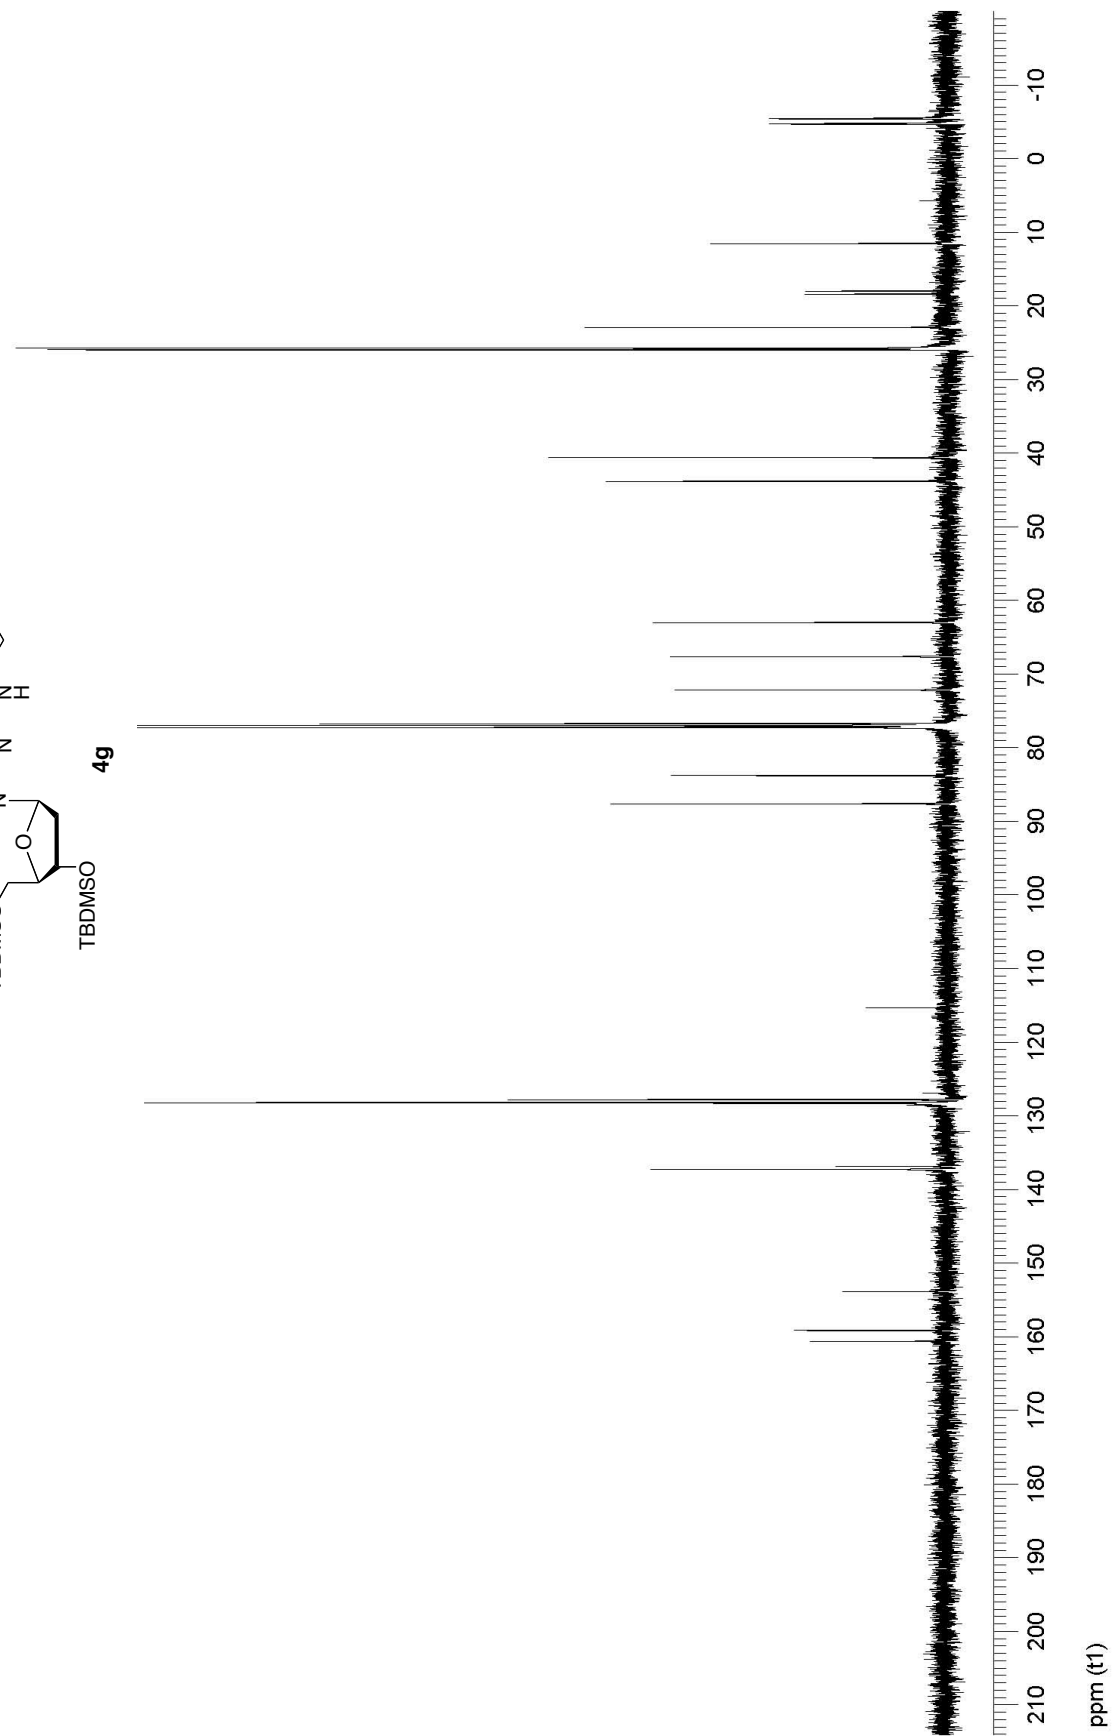

SB-1205-07-19-1H

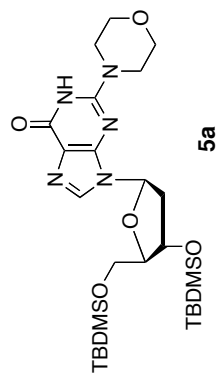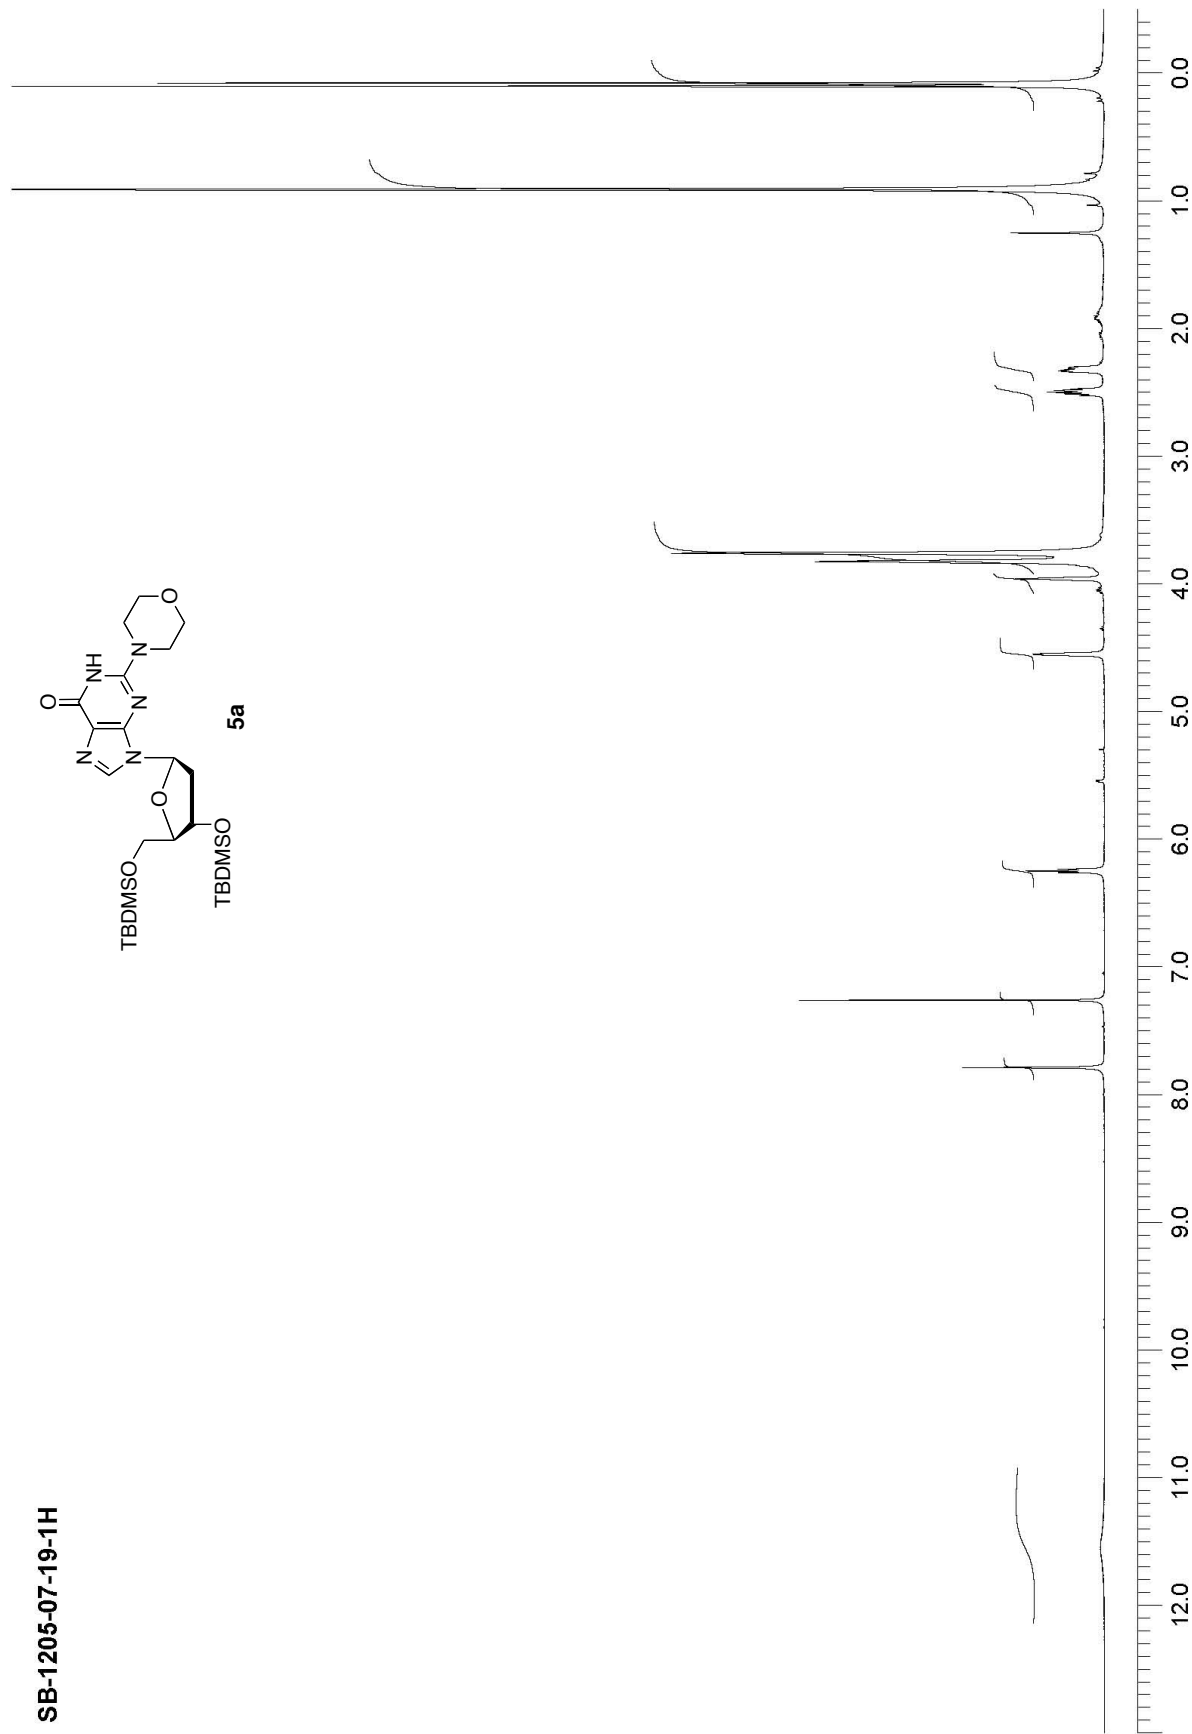

ppm (t1)

SB-1205-07-22-1H

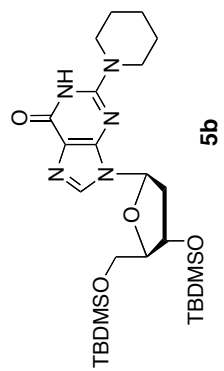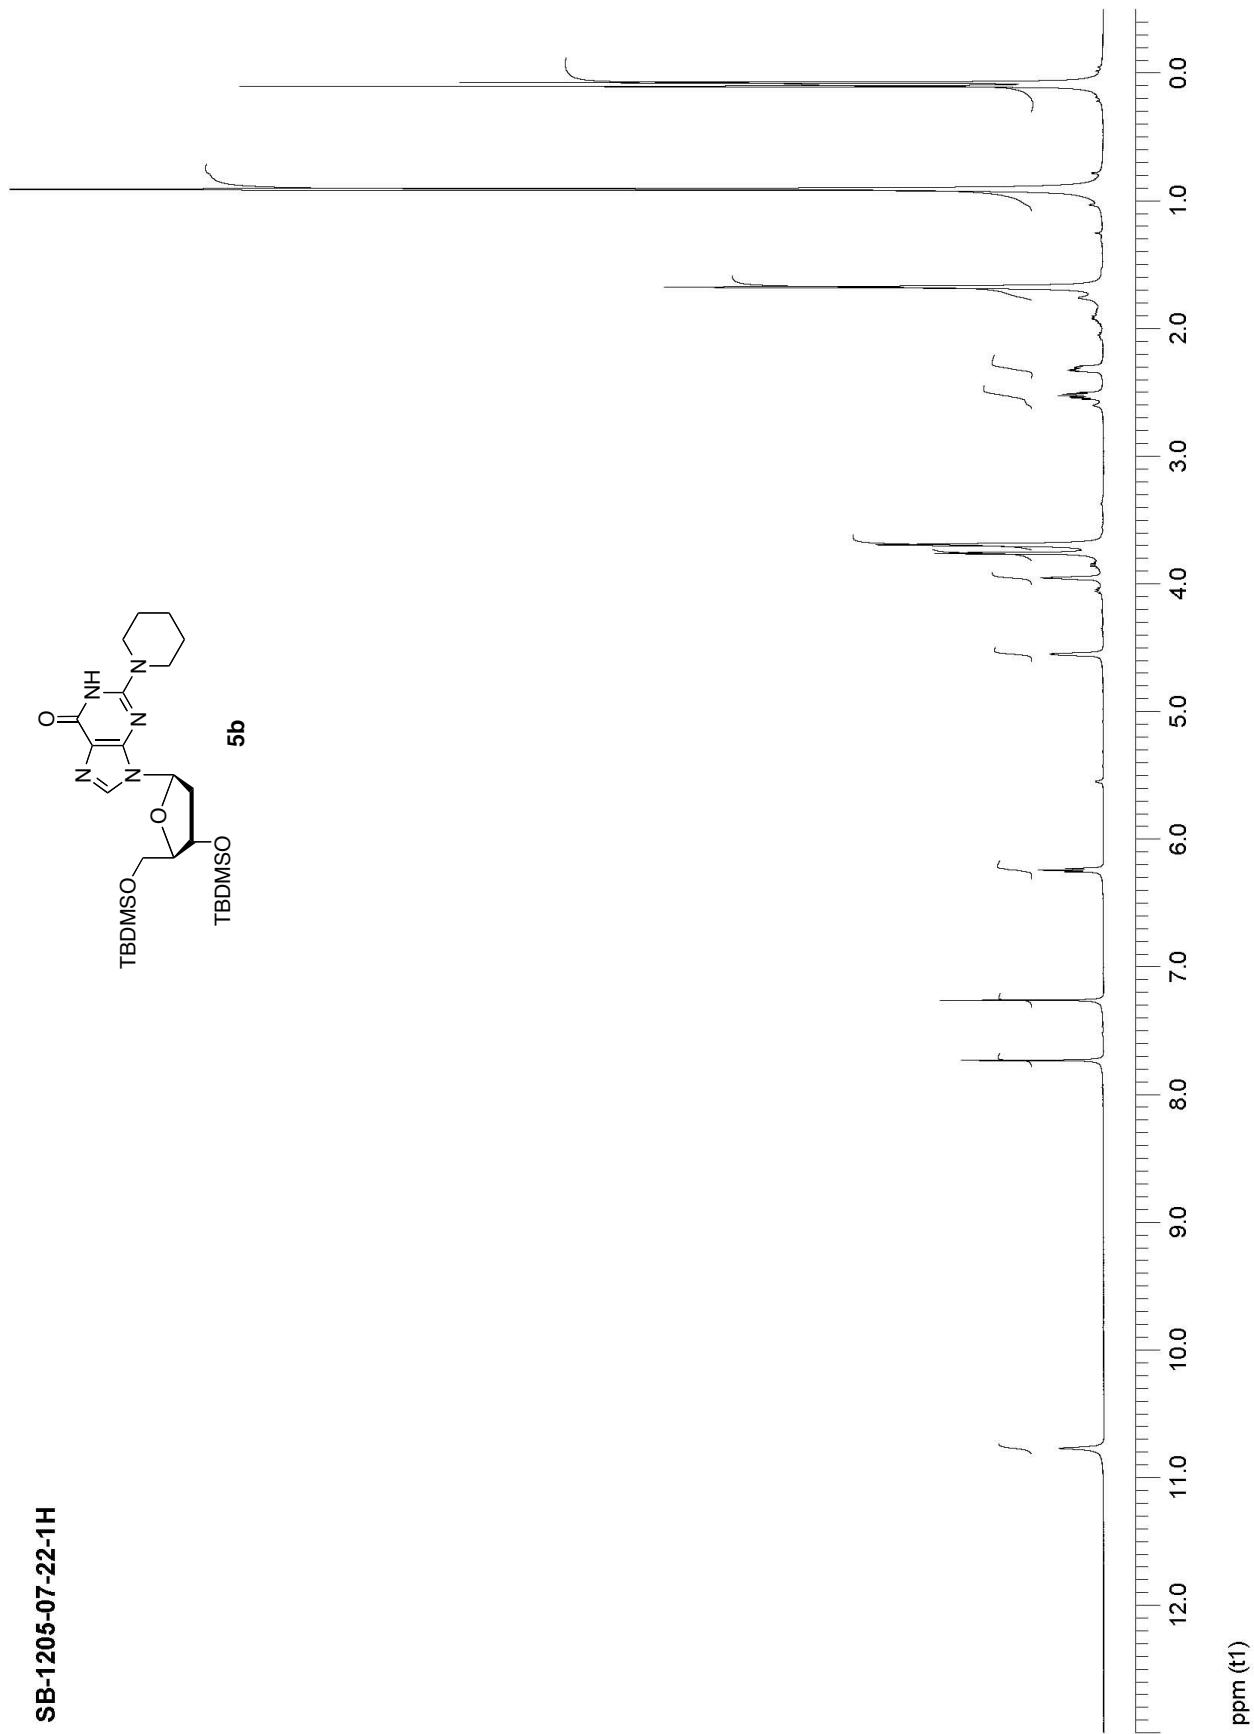

ppm (t1)

SB-1205-07-24-column-1H

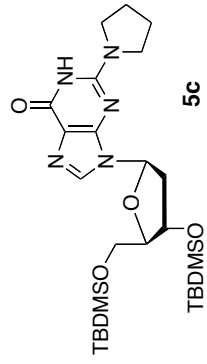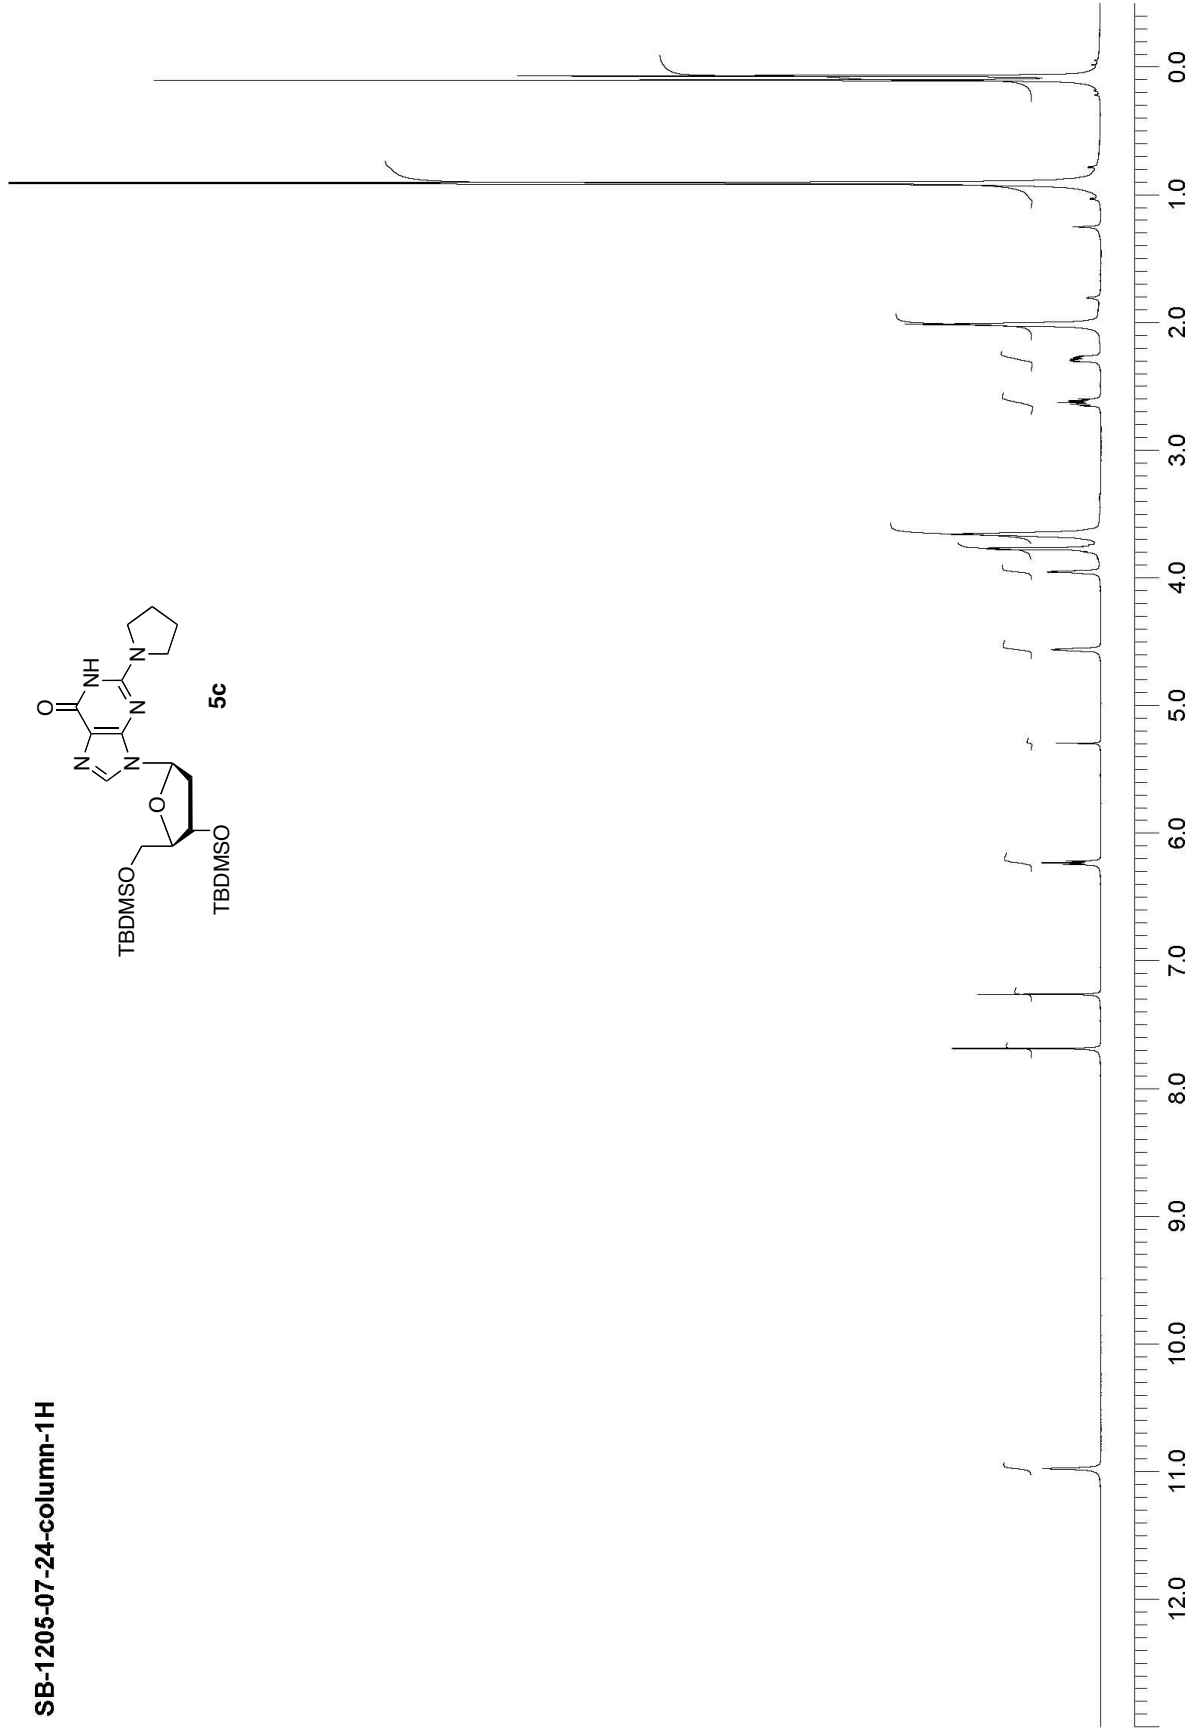

ppm (t1)

SB-1205-07-23-1H

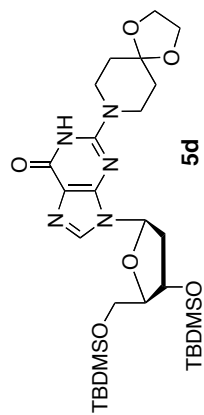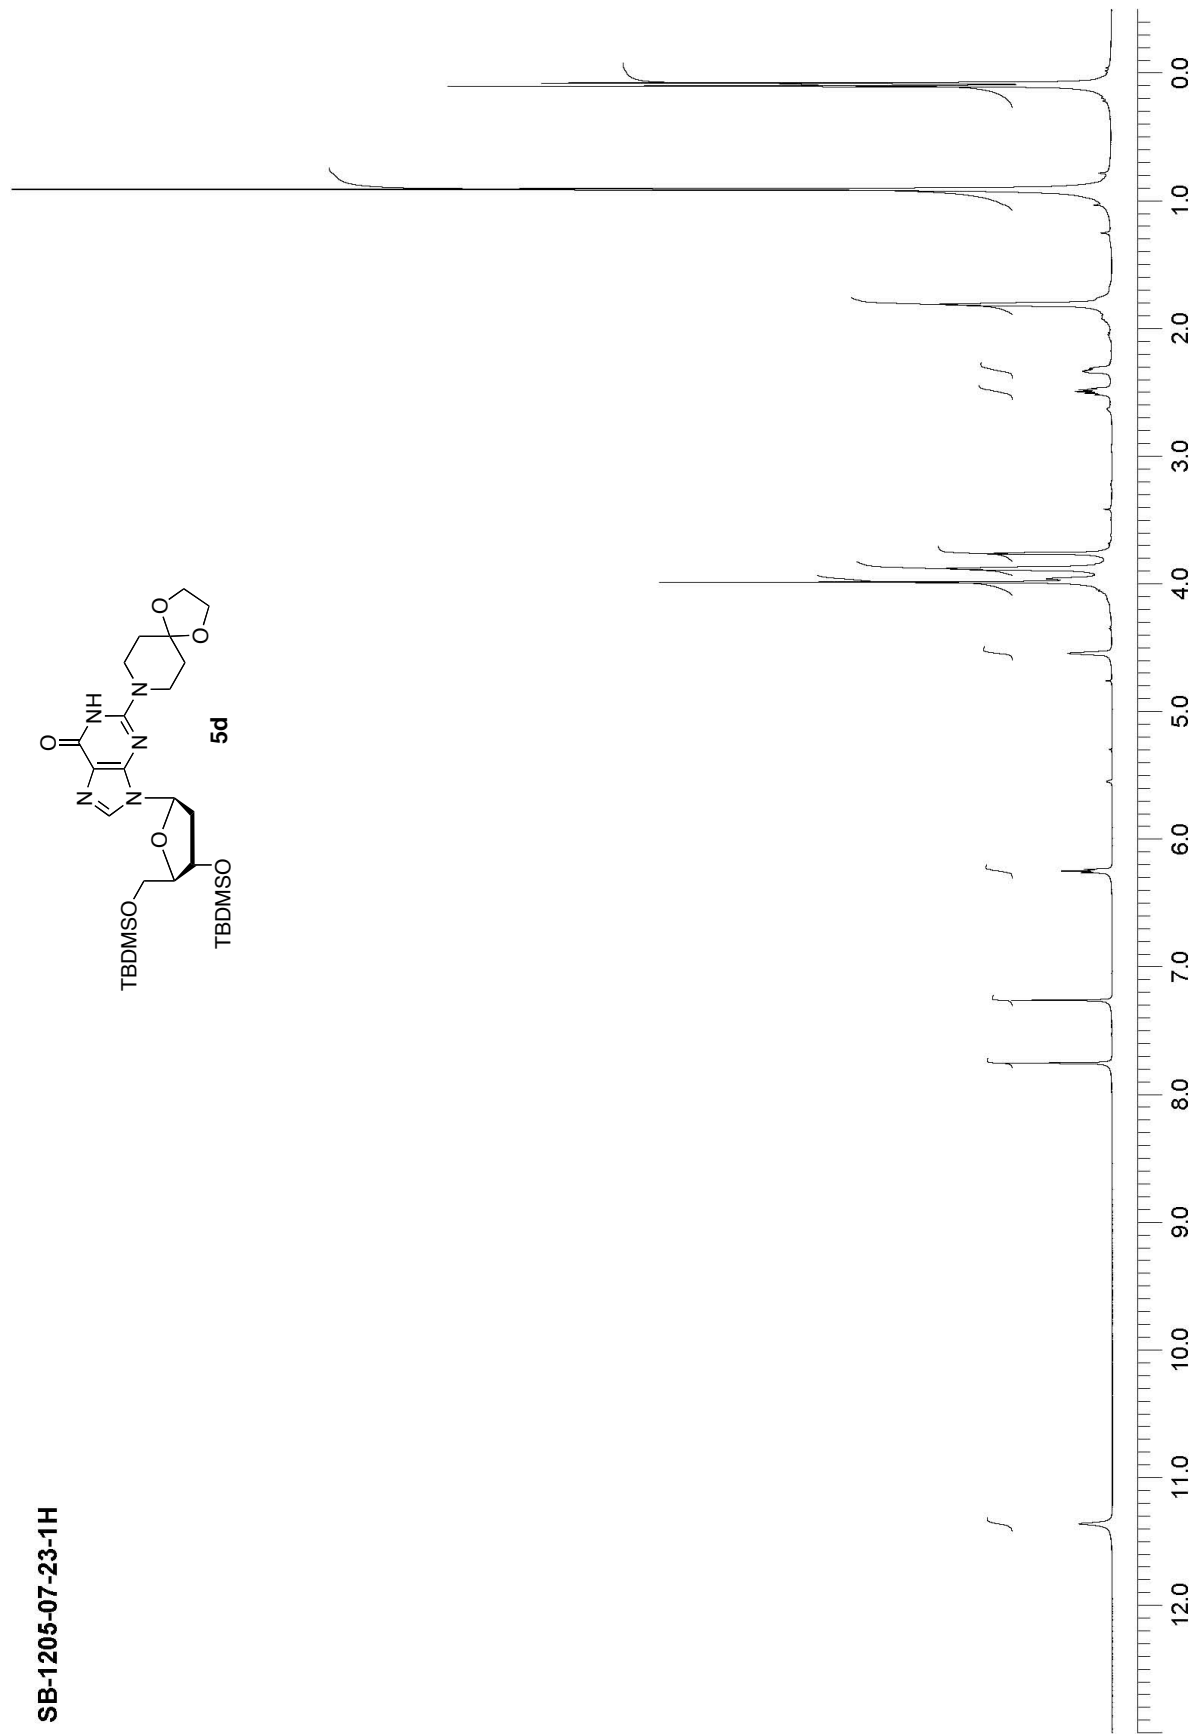

ppm (t1)

SB-1205-07-27-1H

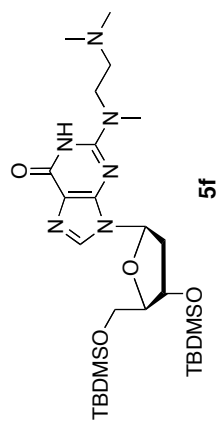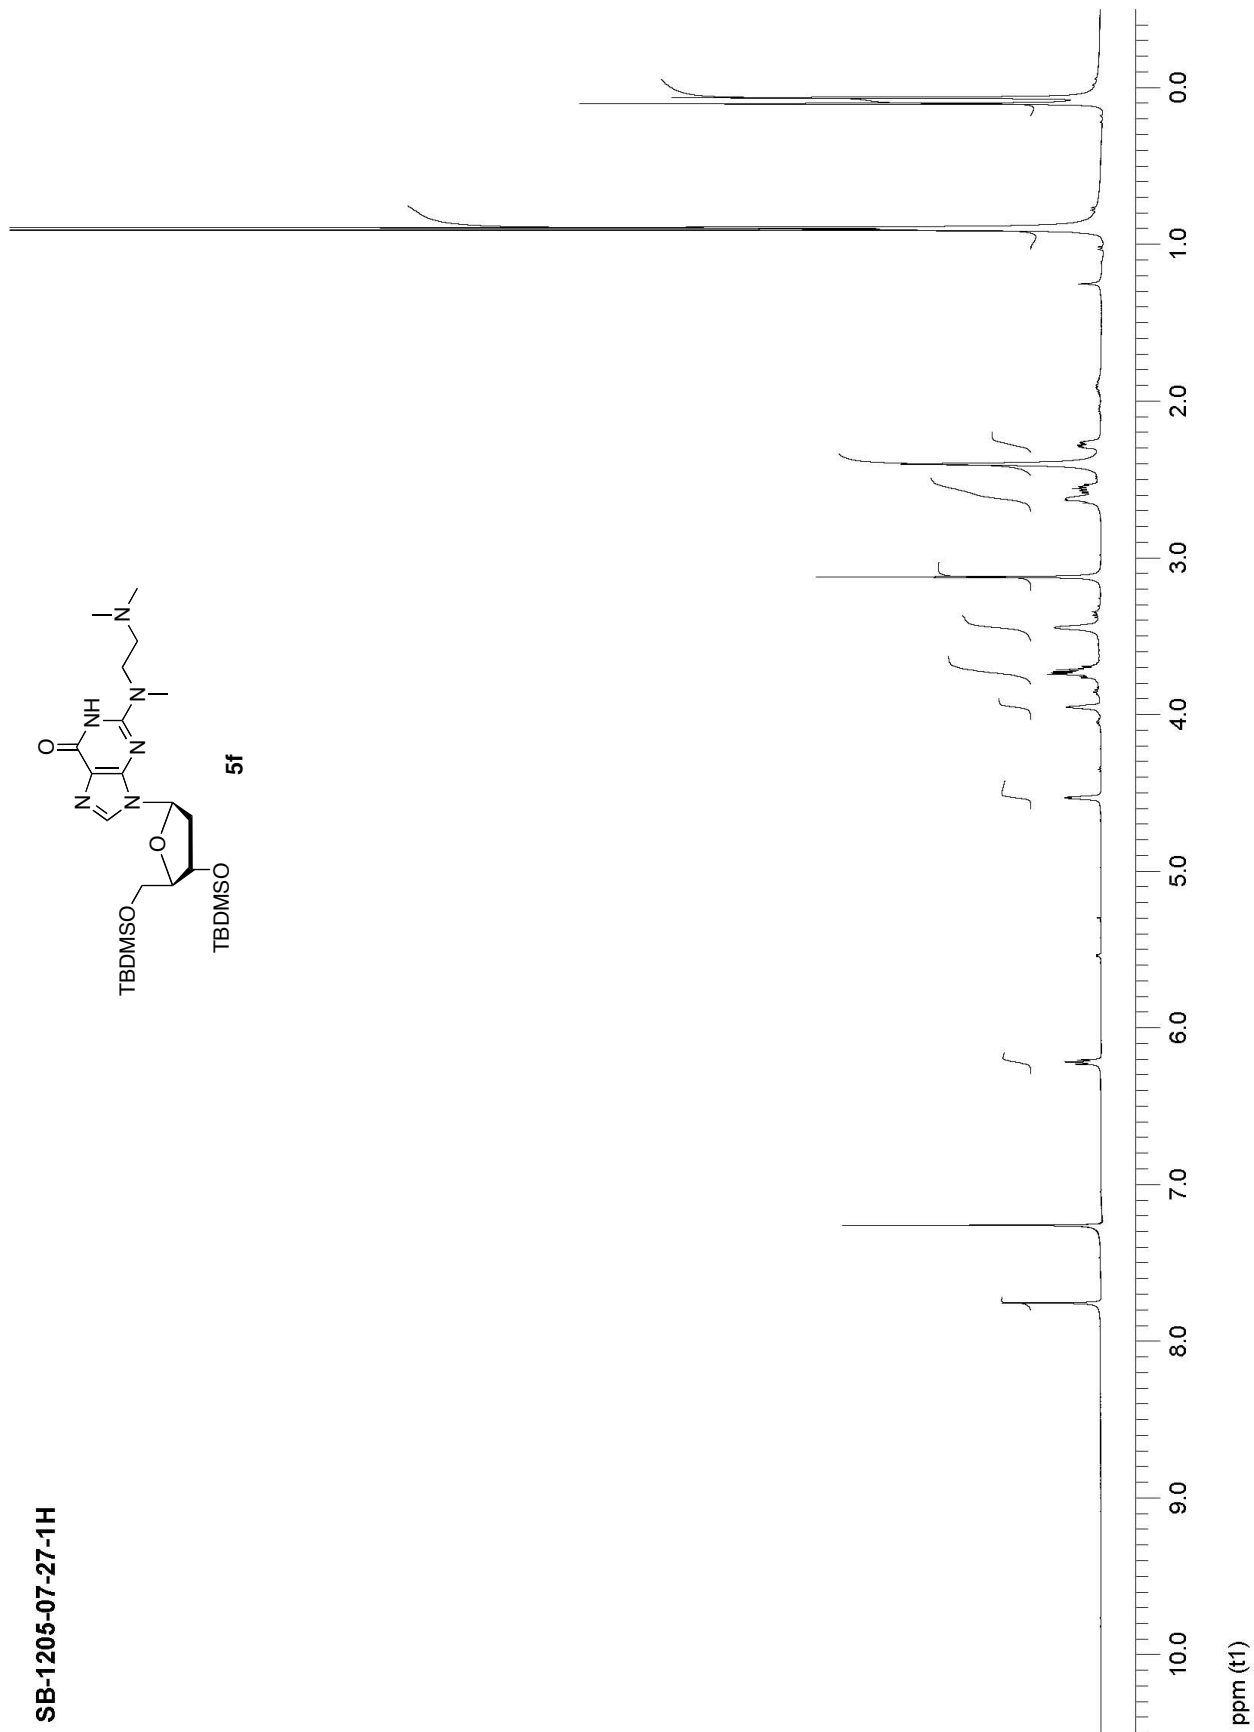

ppm (t1)



SB-1205-07-26-1H

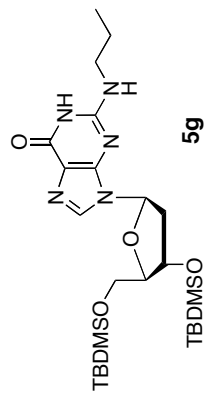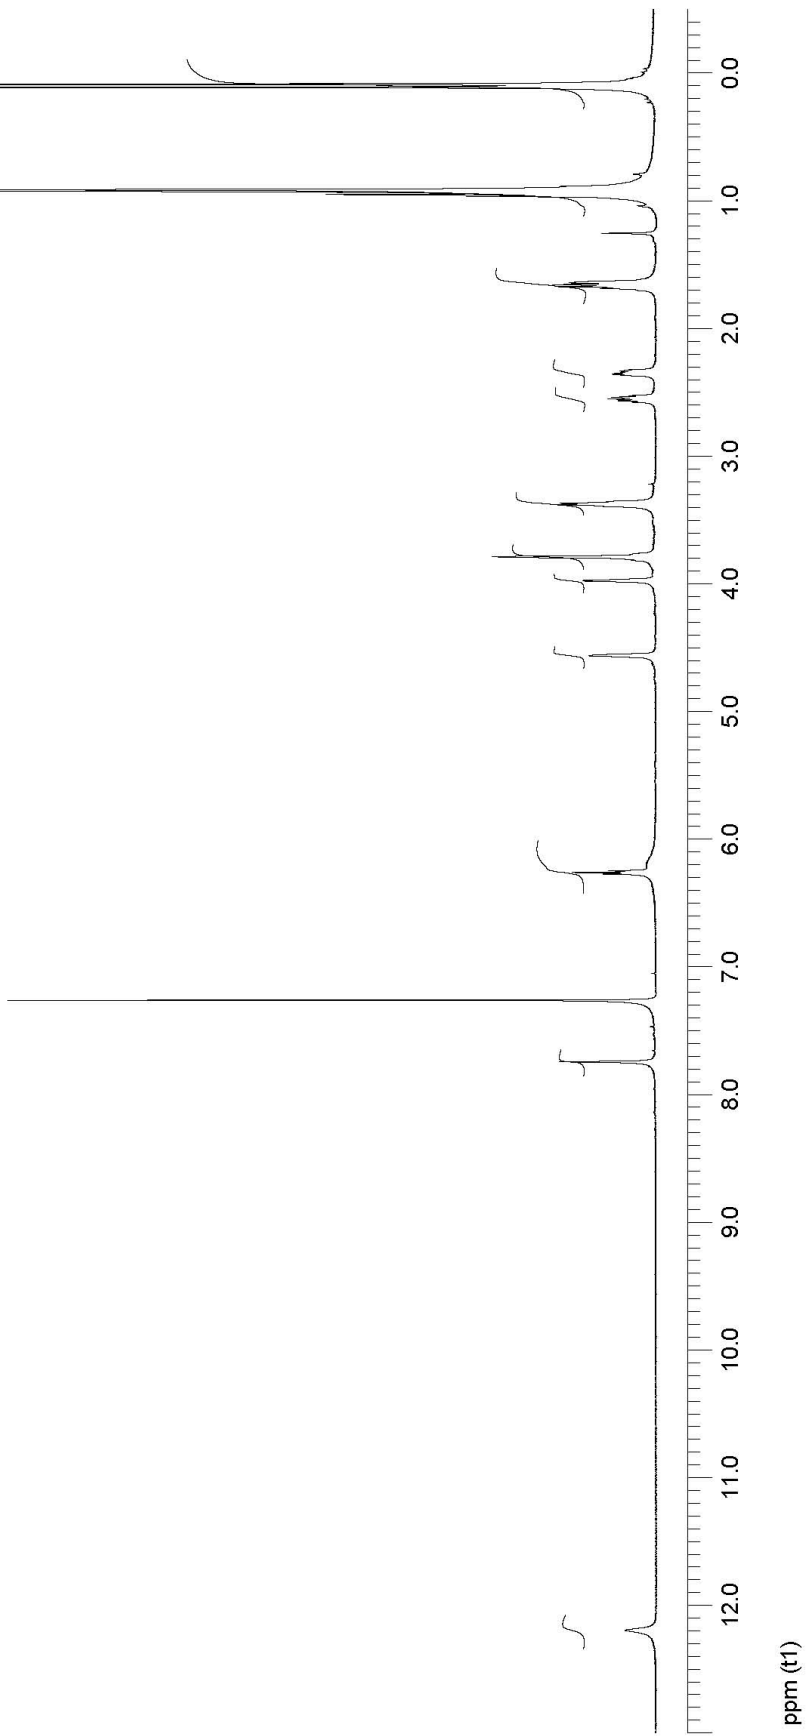

SB-1205-07-66-column-1H

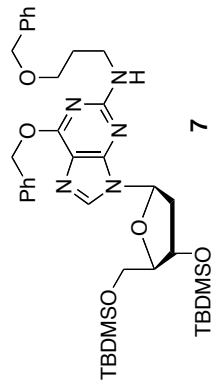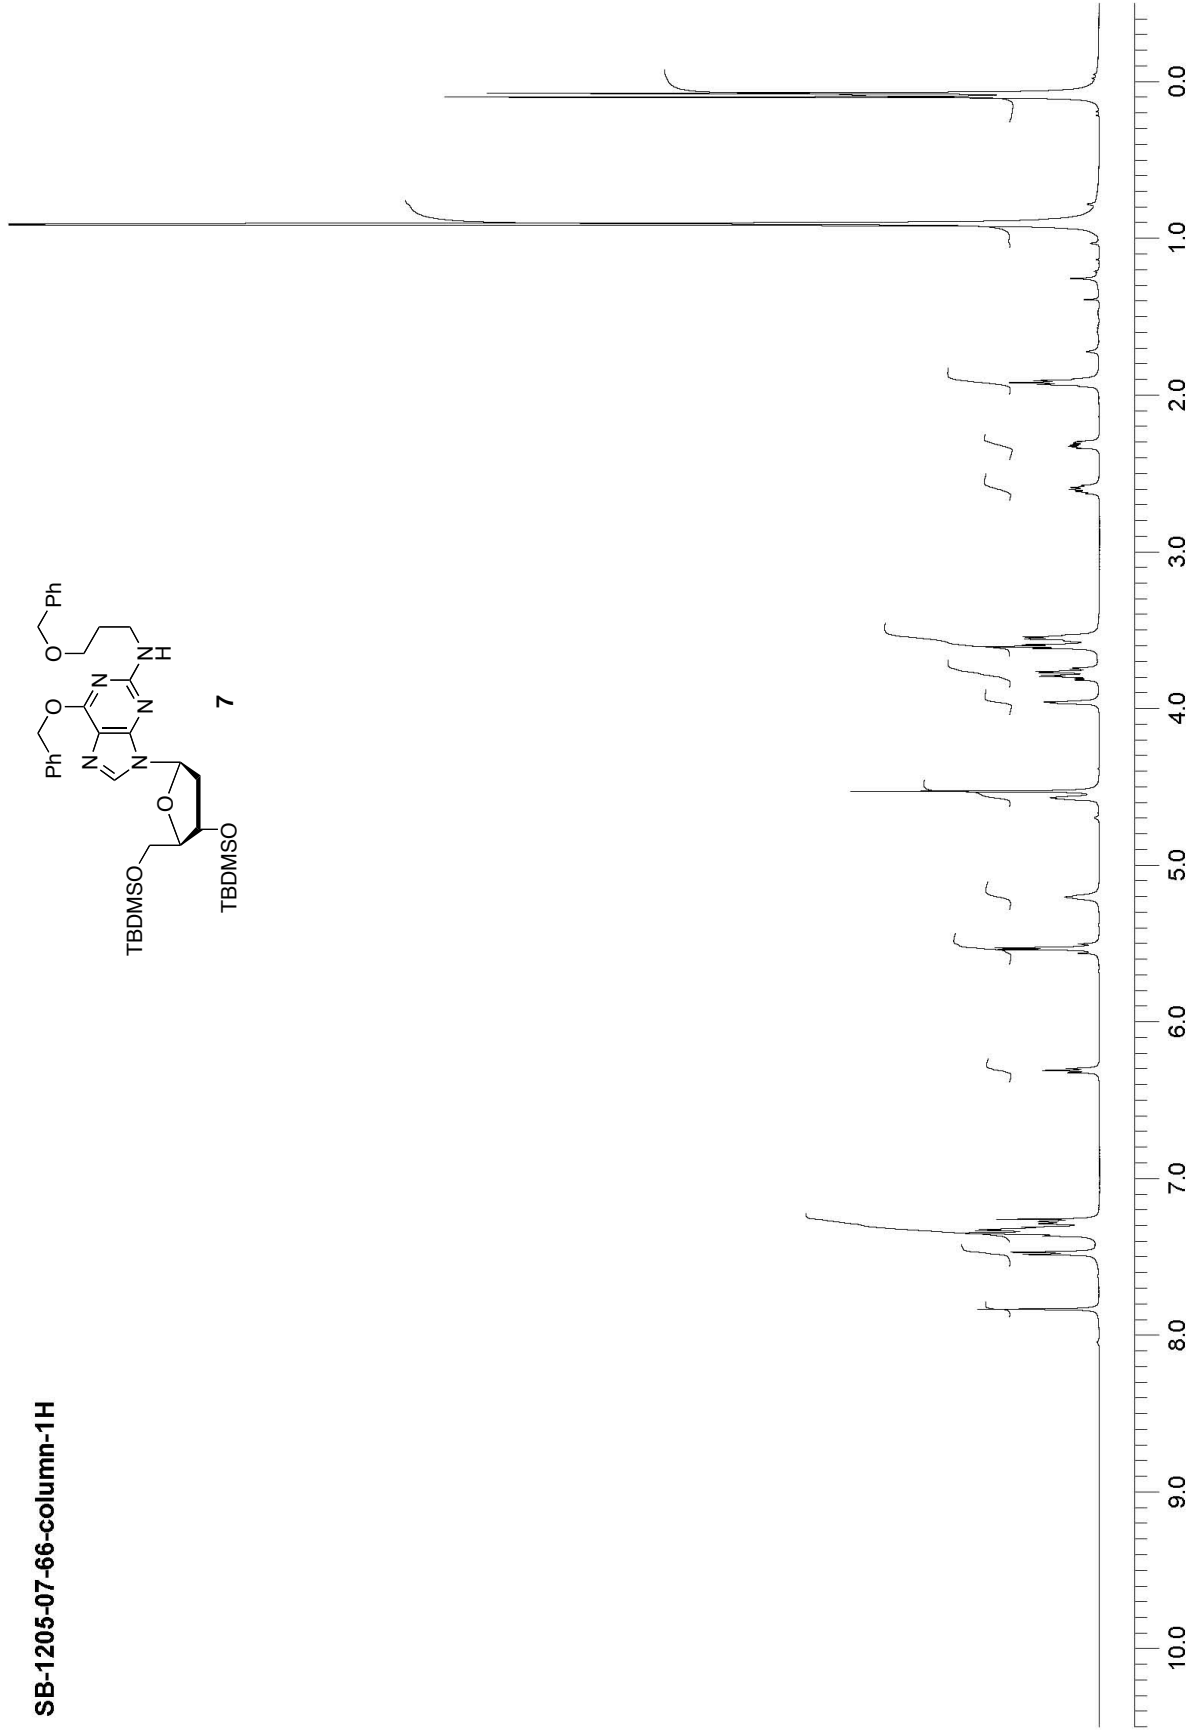

ppm (t1)

SB-1205-07-66-column-13C

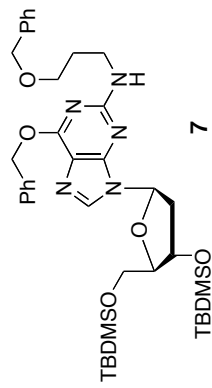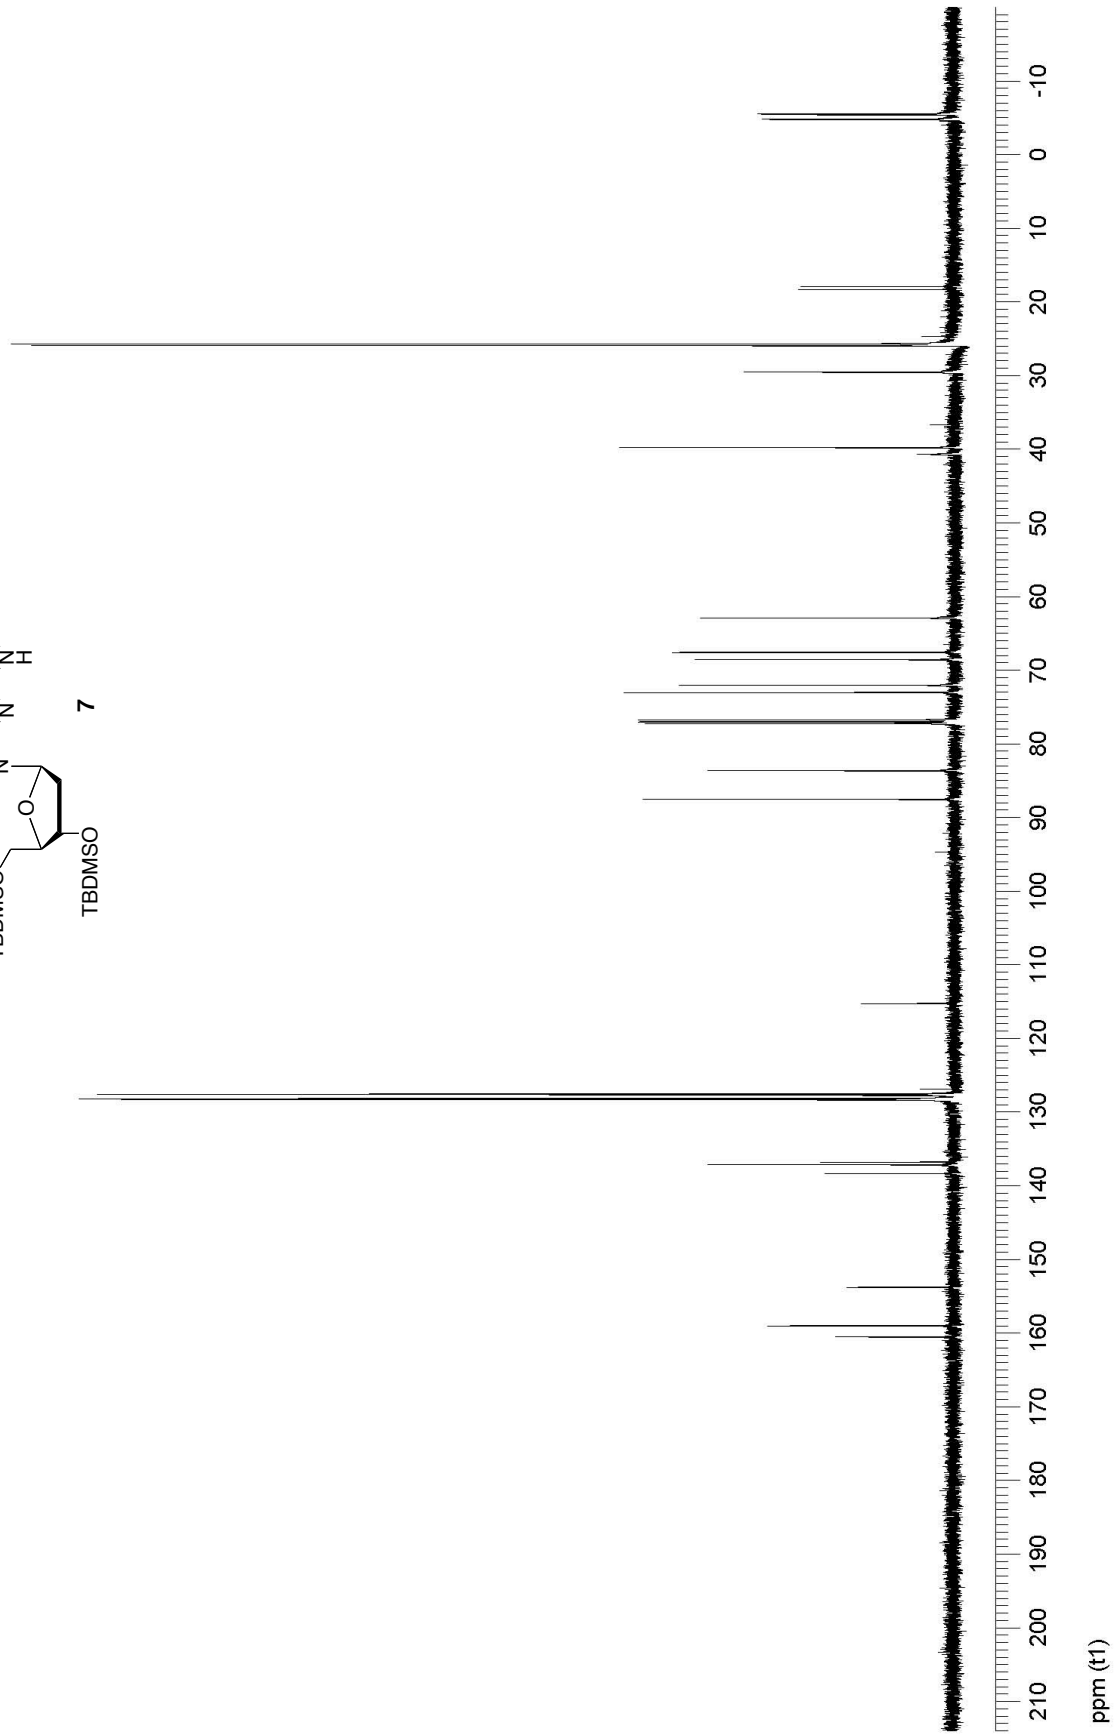

SB-1205-07-60-column-1H

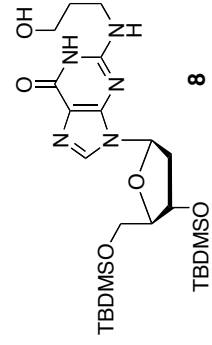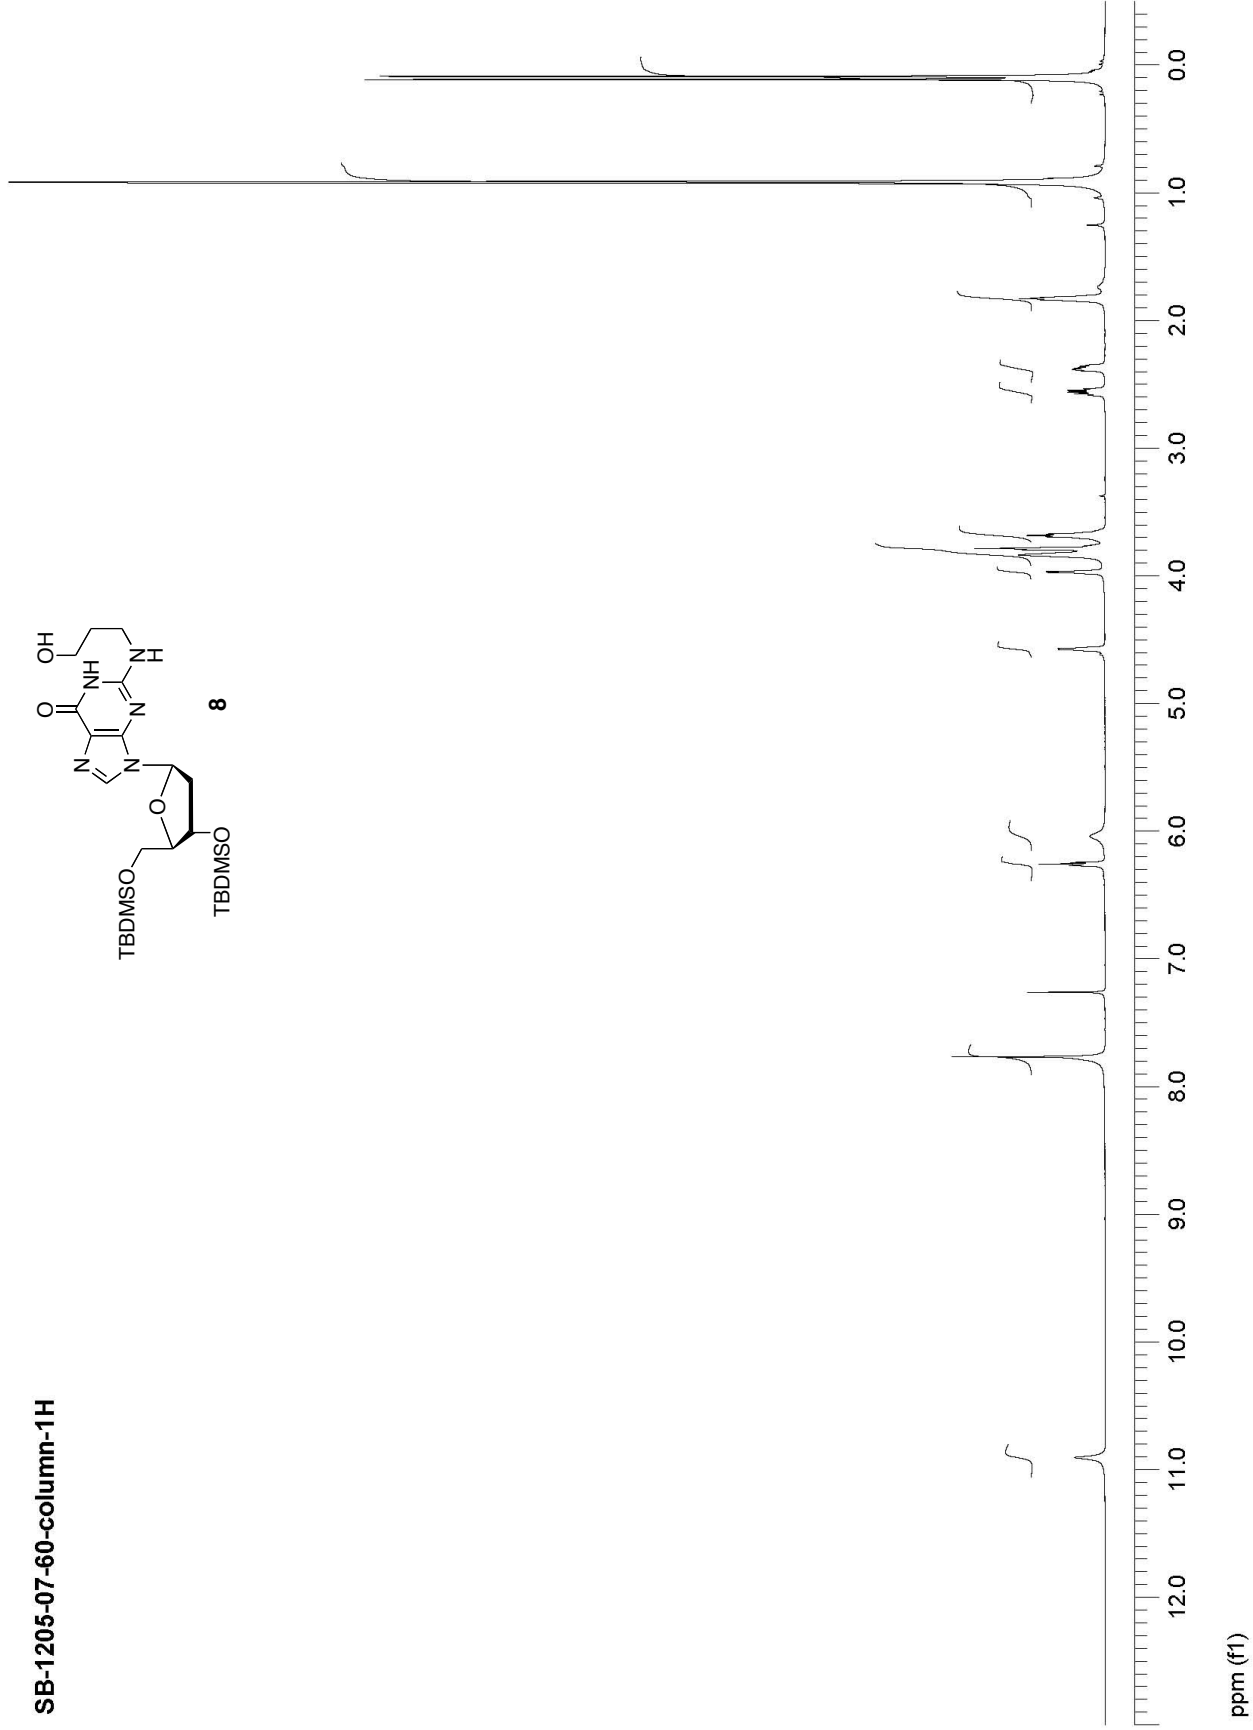

SB-1205-07-60-column-13C

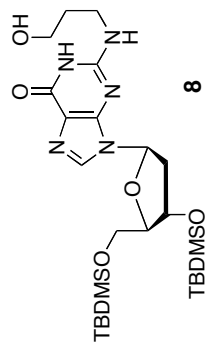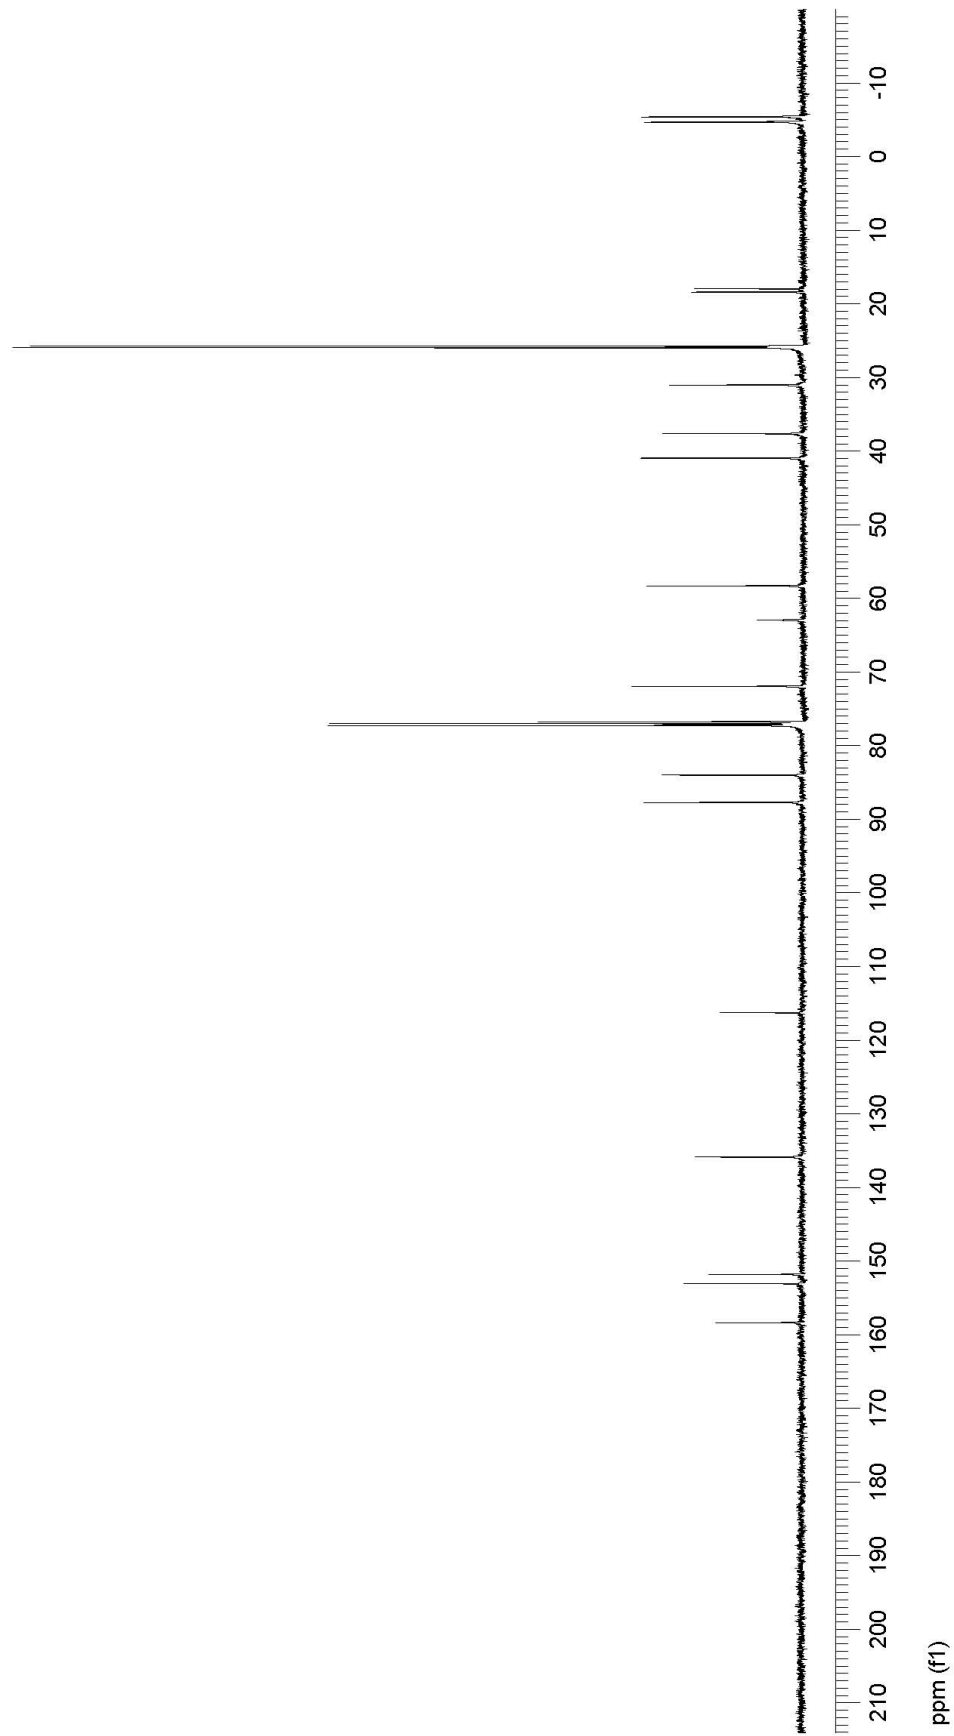

SB-1205-08-11-column-1H

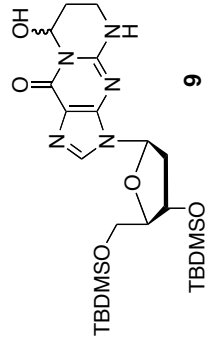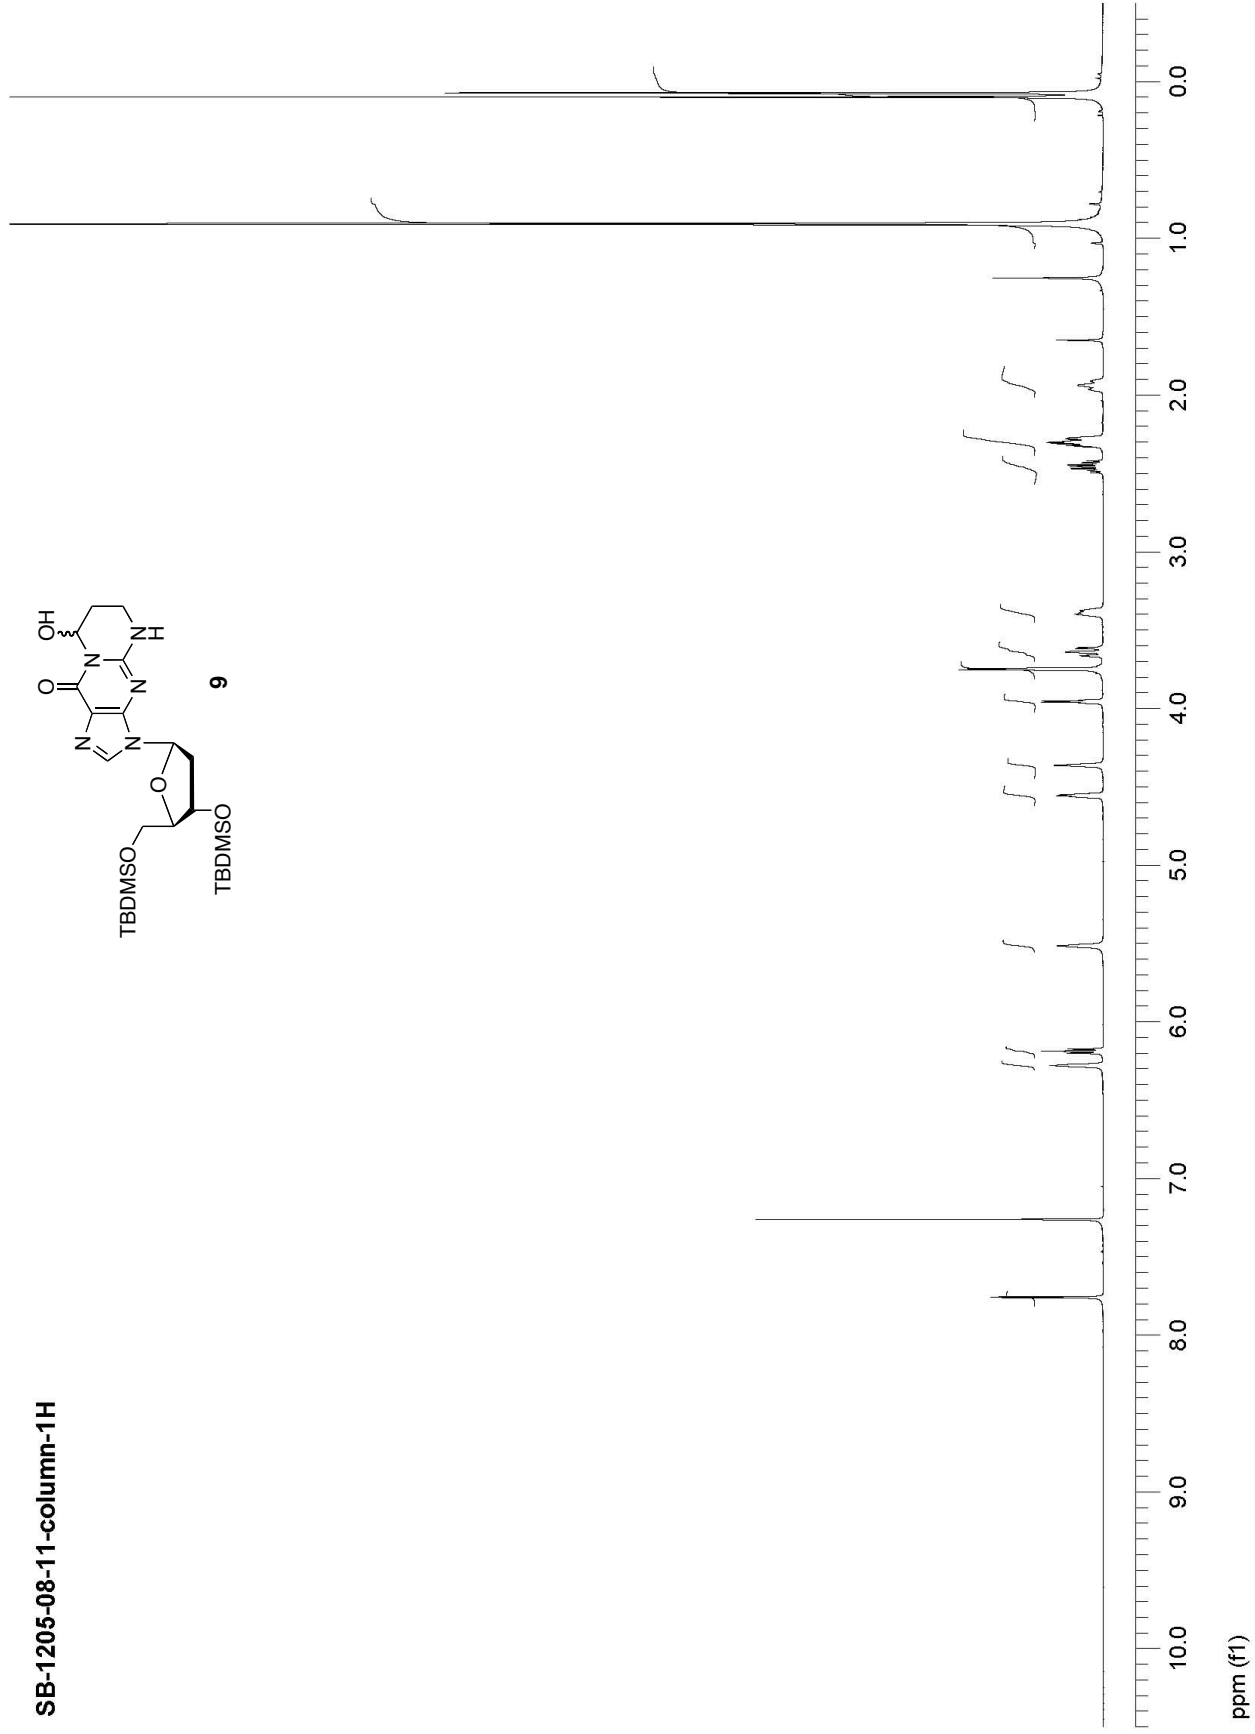

SB-1205-08-11-column-13C

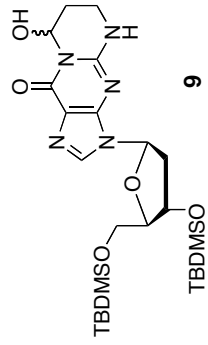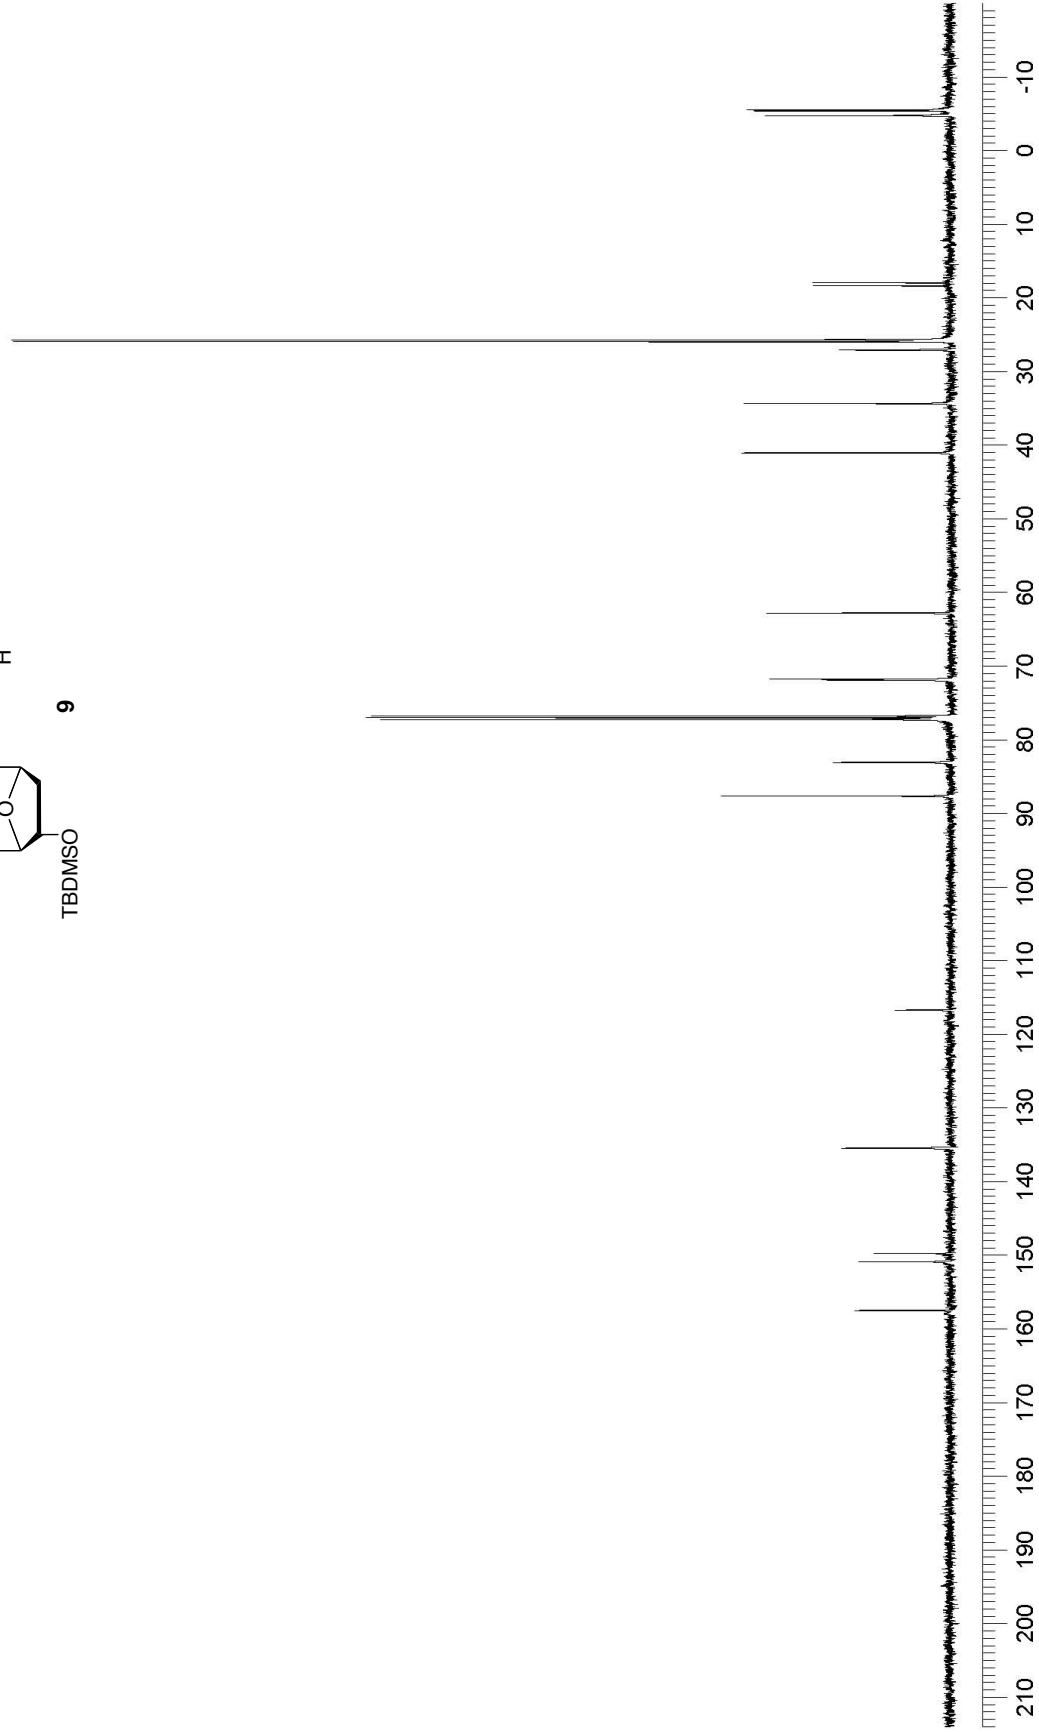

ppm (t1)
